# Supplementary material
Source: PubMed Central journal article supplement (PMC3376540)
Supplement: mmc1.pdf [file mmc1.pdf]

The American Journal of Human Genetics, Volume 90

## **Supplemental Data**

### **Rare and Common Variants in *CARD14*, Encoding an Epidermal Regulator of NF-kappaB, in Psoriasis**

**Catherine T. Jordan, Li Cao, Elisha D.O. Roberson, Shenghui Duan, Cynthia A. Helms, Rajan P. Nair, Kristina Callis Duffin, Philip E. Stuart, David Goldgar, Genki Hayashi, Emily H. Olfson, Bing-Jian Feng, Clive R. Pullinger, John P. Kane, Carol Wise, Raphaela Goldbach-Mansky, Michelle A. Lowes, Lynette Peddle, Vinod Chandran, Wilson Liao, Proton Rahman, Gerald G. Krueger, Dafna Gladman, James T. Elder, Alan Menter, and Anne M. Bowcock**

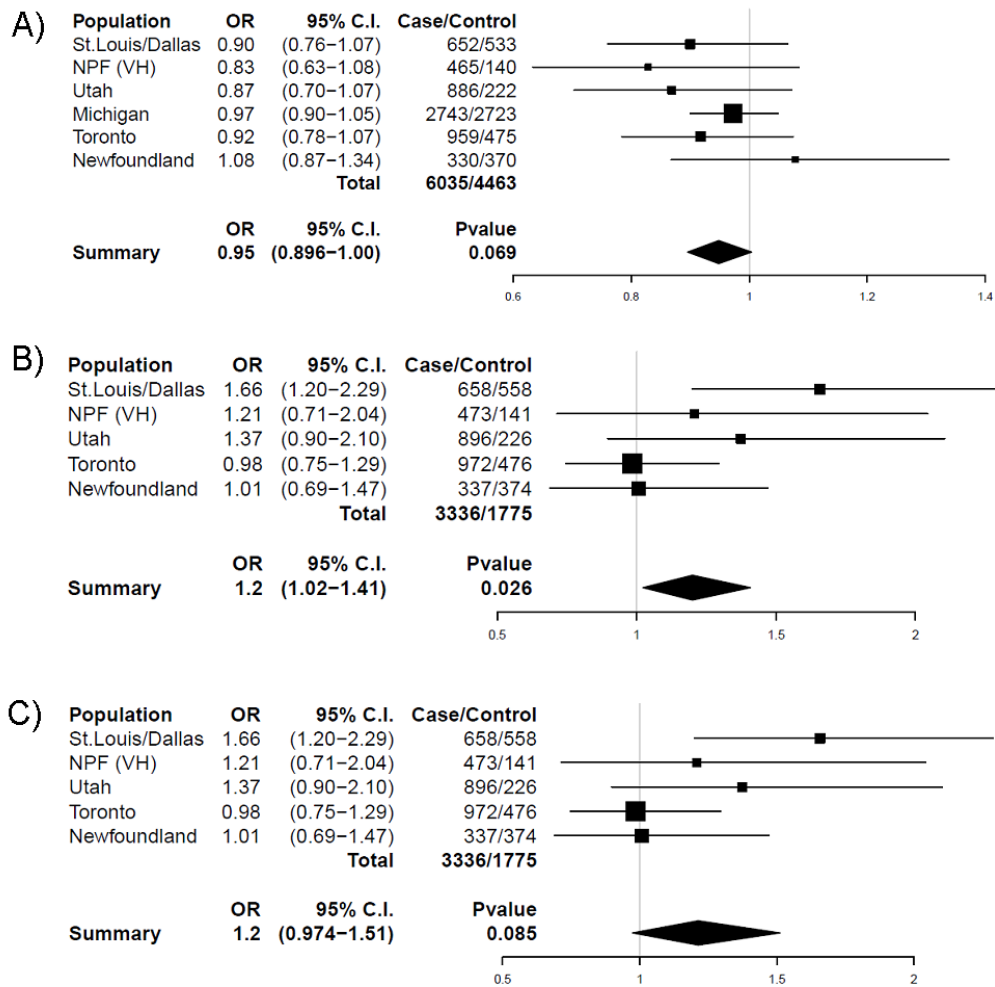

**Figure S1. Test for Association of Psoriasis with rs2066964 and rs34367357 across 6 Case/Control Cohorts of European Ancestry**

The results of meta-analysis in the six cohorts of European ancestry based on the fixed- and random-effects models are shown.

(A) fixed-effects meta-analysis for rs2066964, (B) fixed-effects meta-analysis for rs34367357, and (C) random-effects meta-analysis for rs34367357. Results of random-effects meta-analysis for rs2066964 were identical to those for fixed-effects and are thus not presented.

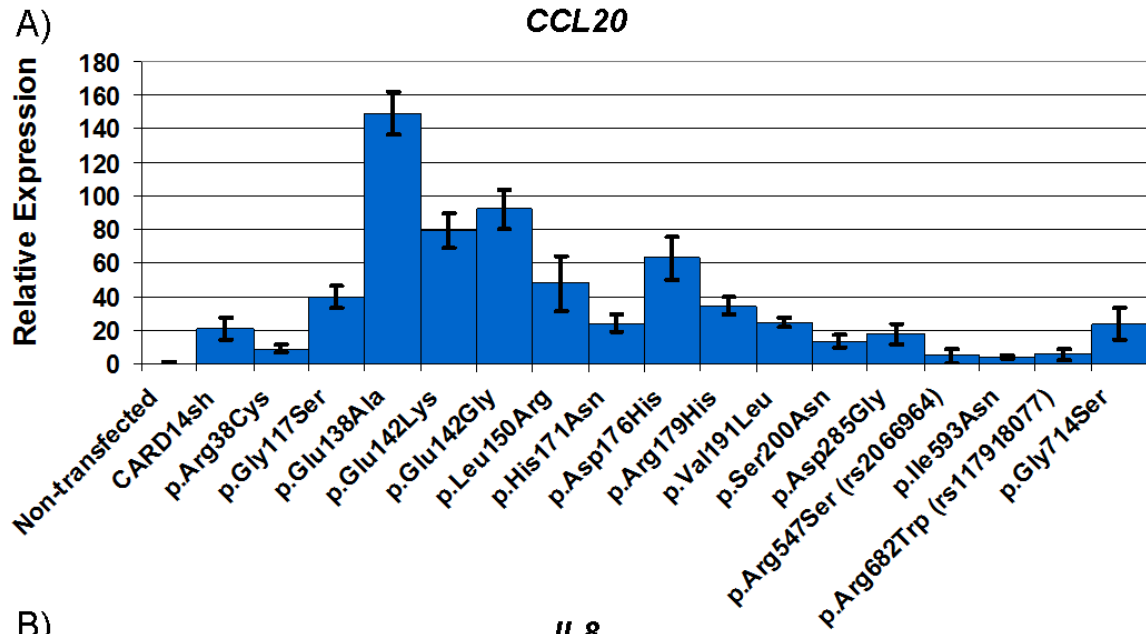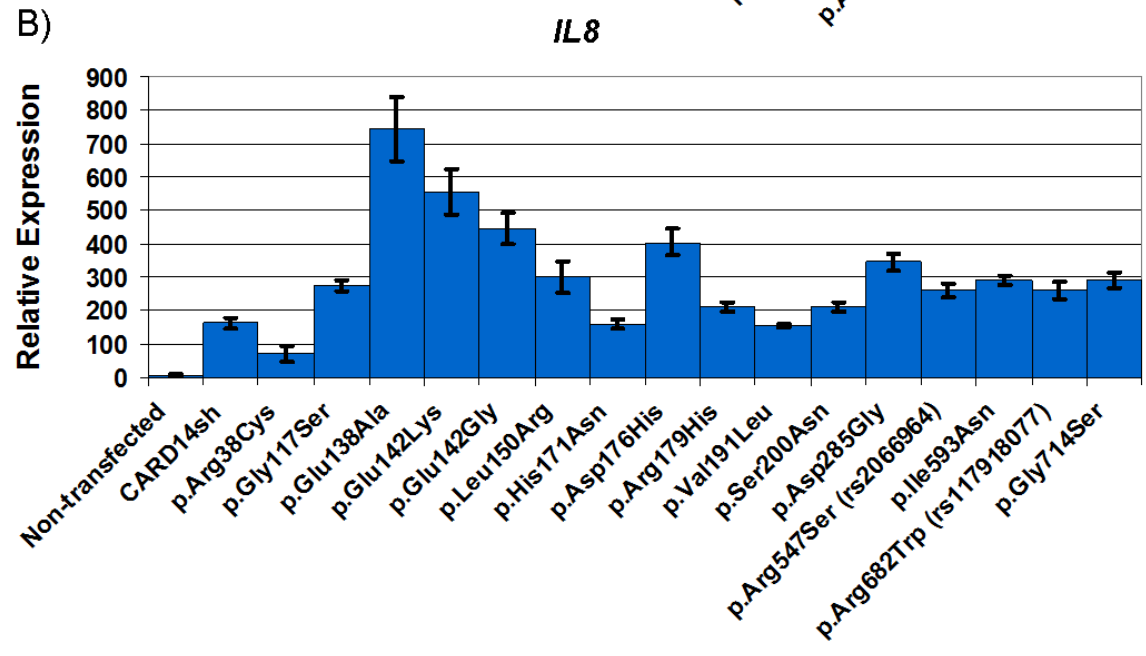

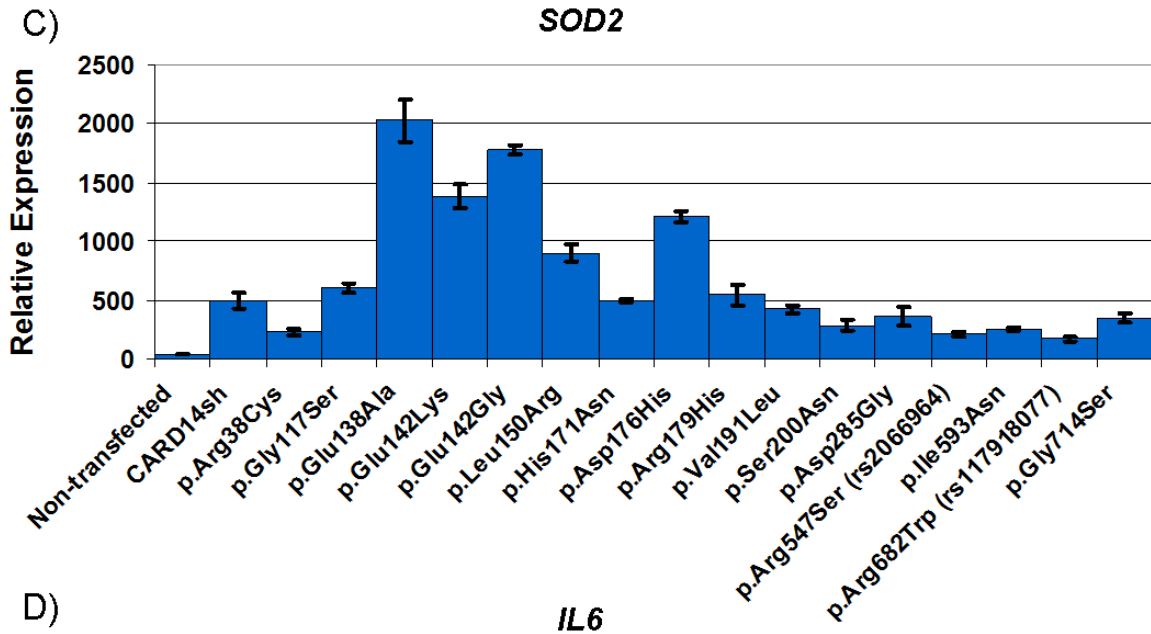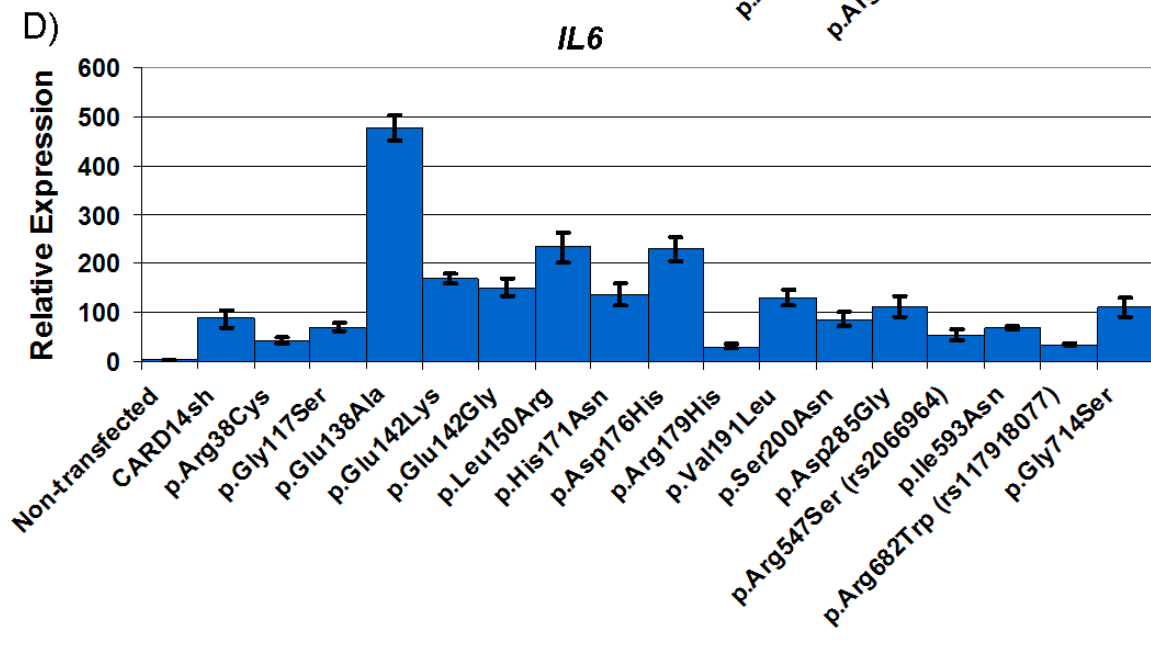

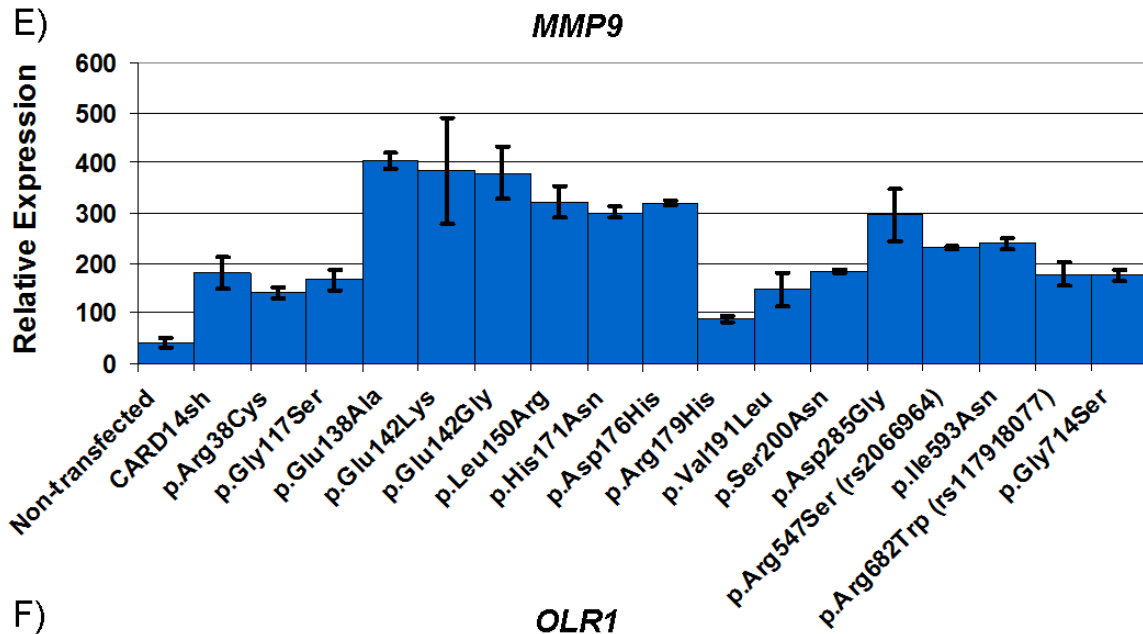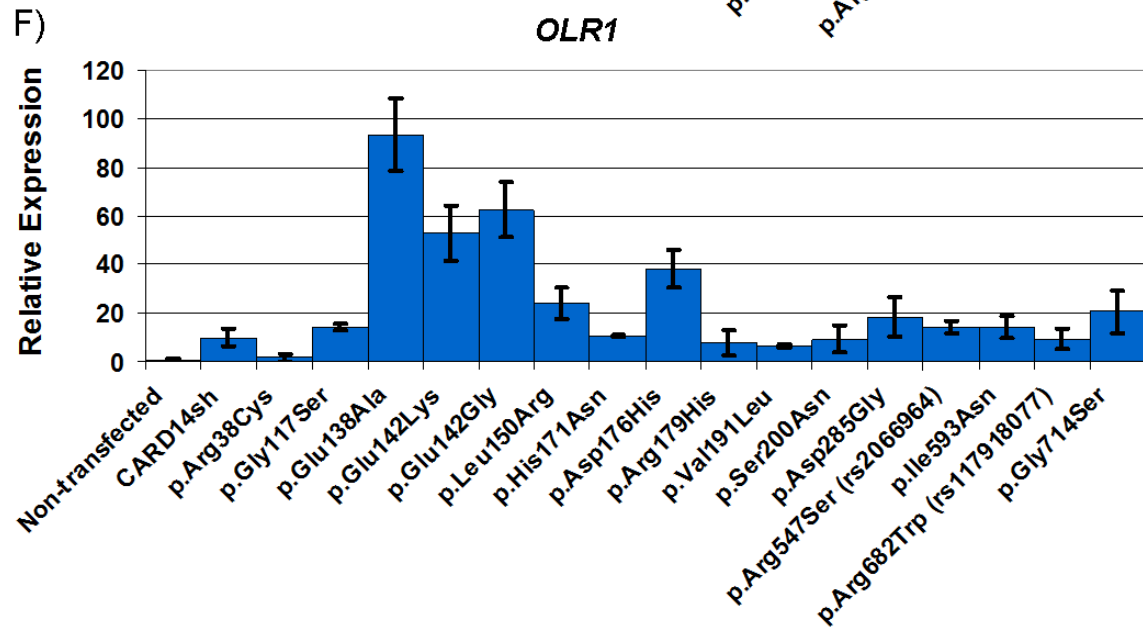

G)

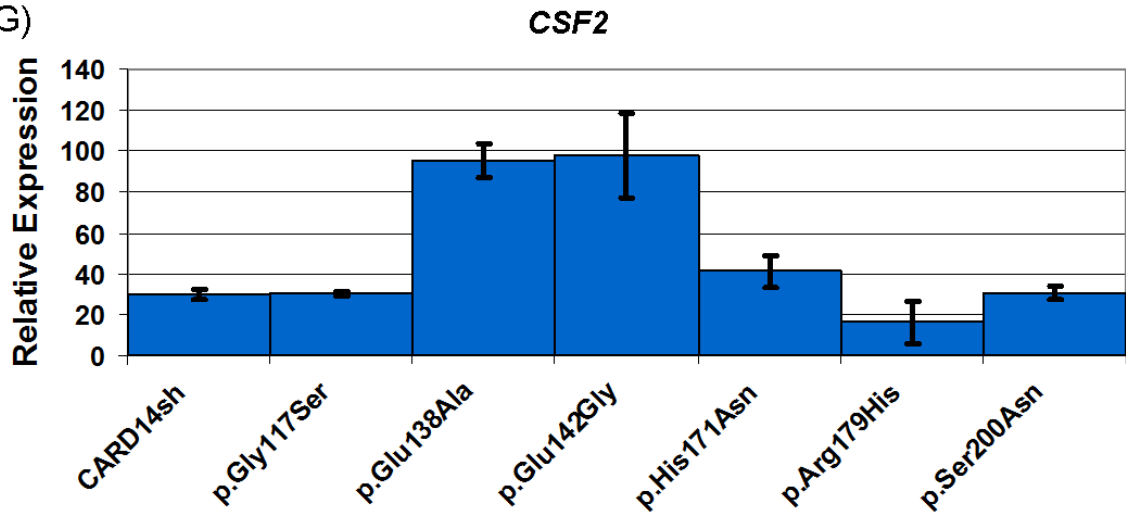

H)

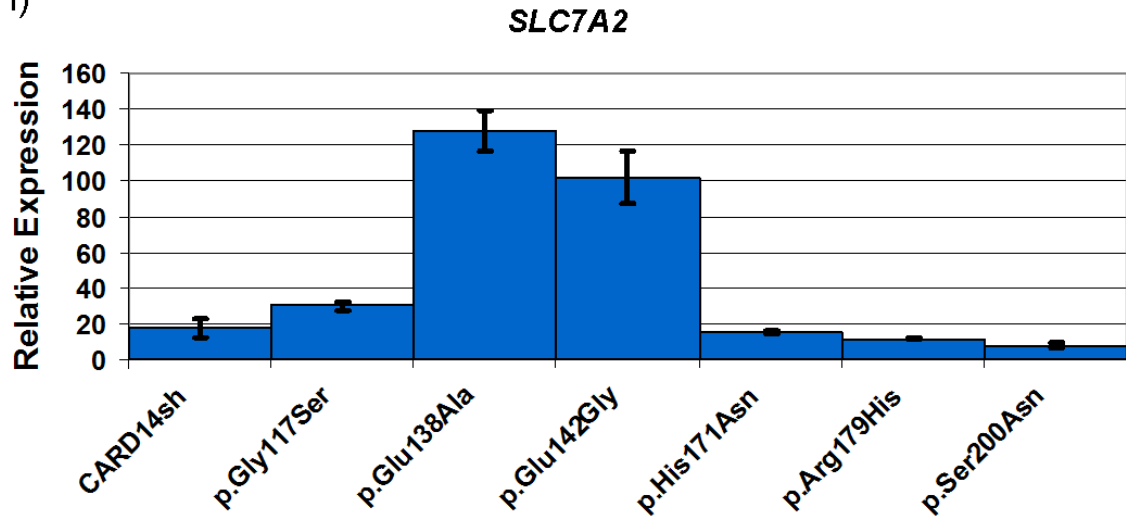

l)

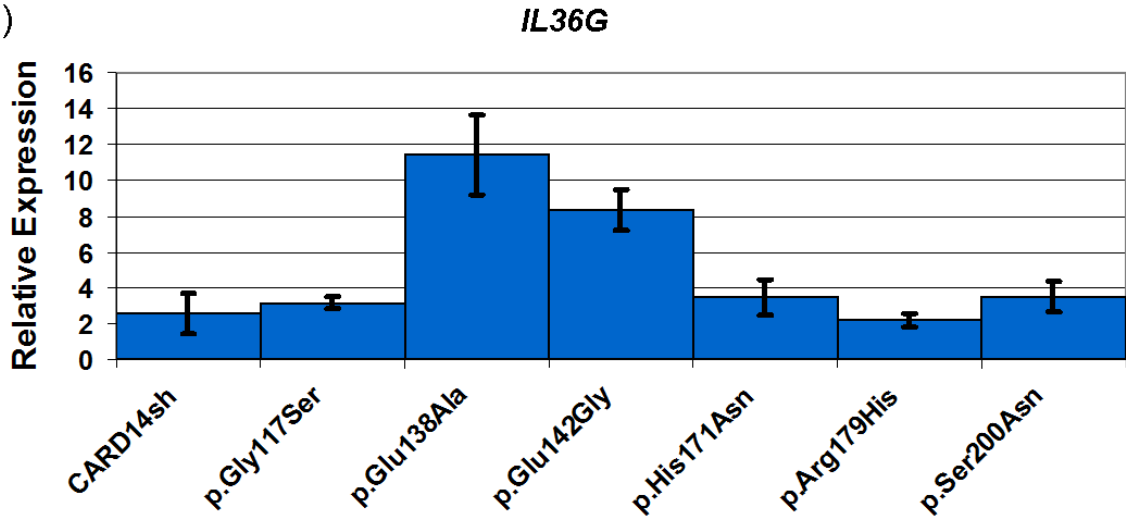

j)

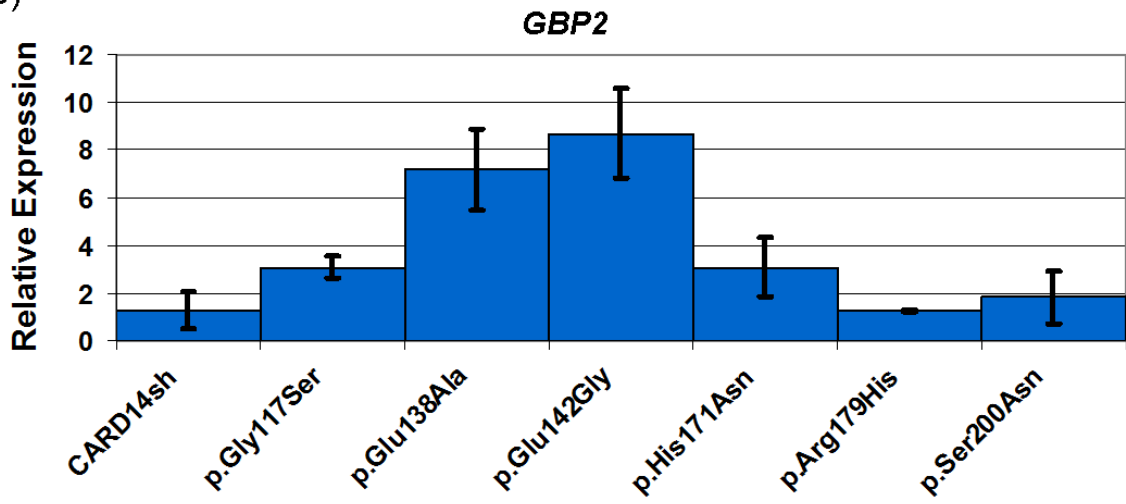

K

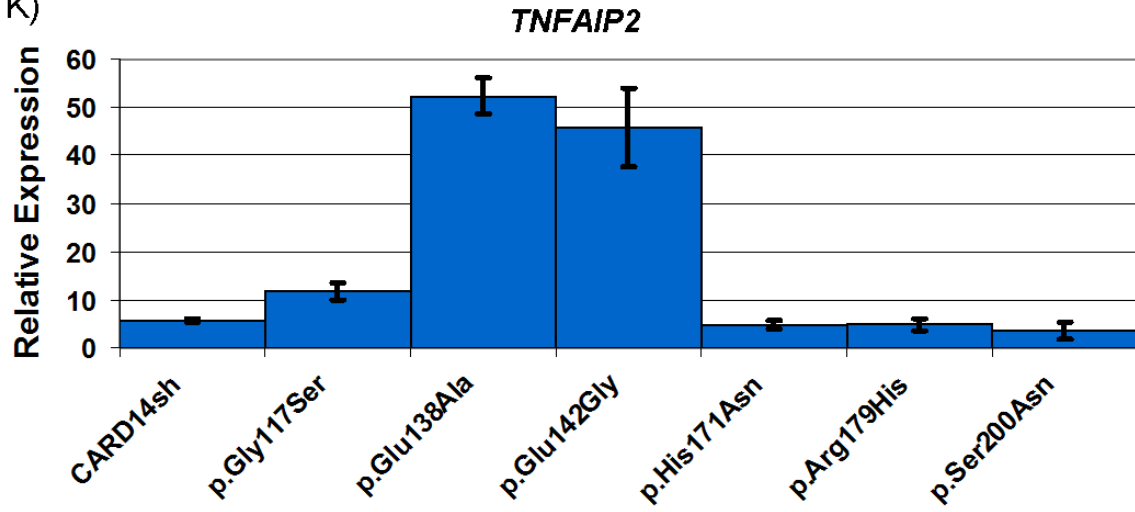

L

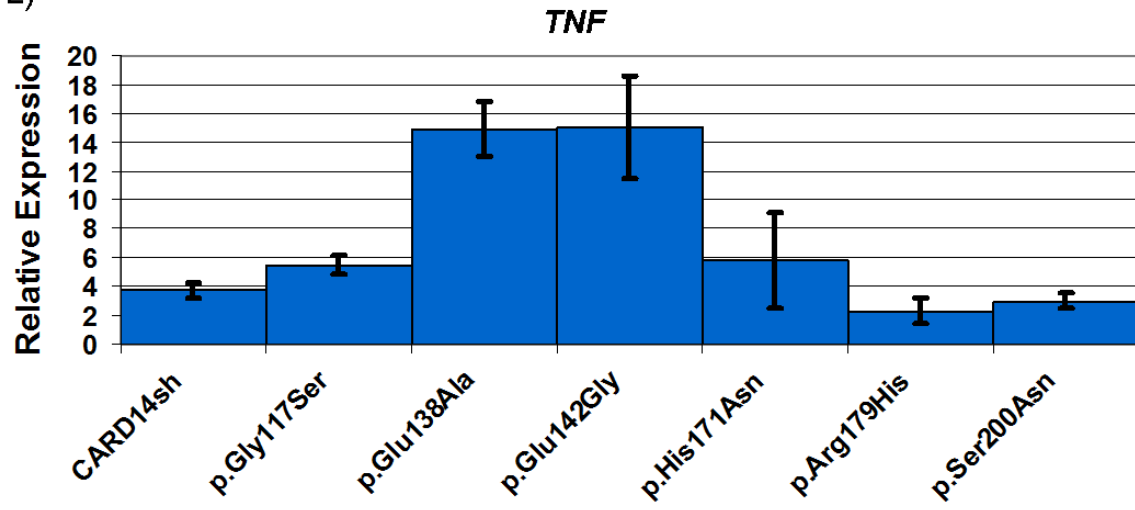



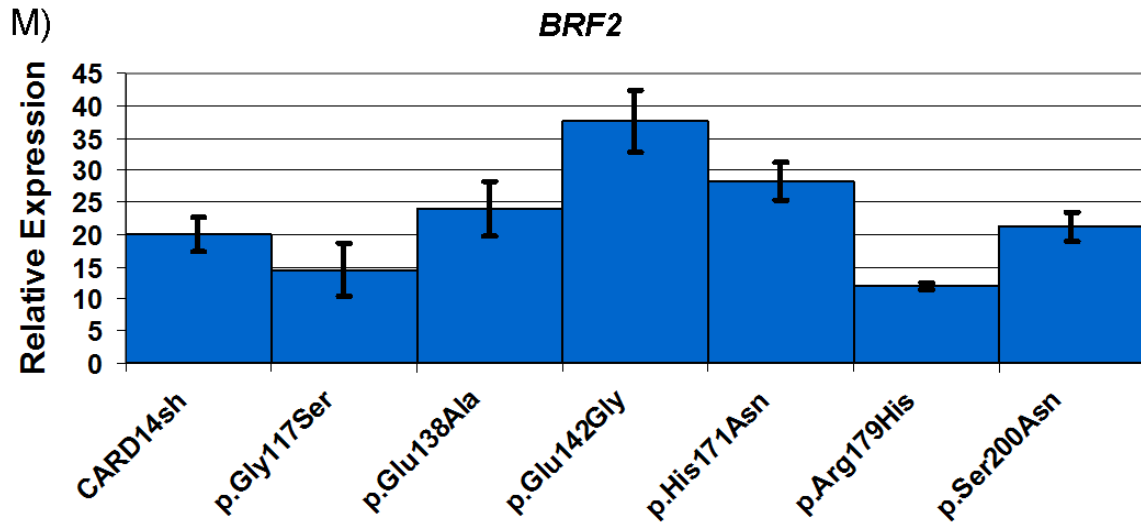

**Figure S2. qRT-PCR Confirmation of Effects of Wild-Type and Variant CARD14 on Transcriptional Activation of a Select Set of Psoriasis-Associated Transcripts**

HEK 001 cells were transfected with wildtype or altered CARD14sh and qRT-PCR was performed to confirm the effects of constructs on expression of *CCL20* (A), *IL8* (B), *SOD2* (C), *IL6* (D), *MMP9* (E), *OLR1* (F), *CSF2* (G), *SLC7A2* (H), *IL36G* (I), *GBP2* (J), *TNFAIP2* (K), *TNF* (L), and *BRF2* (M) identified with global expression profiling. For all qRT-PCR, expression levels were normalized to 18S by the  $2^{-\Delta\Delta Ct}$  method. Expression levels in transfected cells were also normalized to levels of FLAG to correct for differences in transfection efficiency. To transform expression levels to non-decimal integers, all expression levels were multiplied by 100,000 before plotting on graphs. Error bars represent the standard deviation of replicates.

**Table S1. Rare Variants Detected in *CARD14*, Their Predicted Functional Effects, and Number of Observations of Each Variant in Unrelated Cases and Controls from European and Asian Cohorts**

| <i>CARD14</i> Exon | hg19 Position (chr17) | cDNA Change | Protein Change           | SIFT <sup>a</sup> Predicted Effect | # Eur. Cases (Total # Screened) | # Eur. Controls (Total # Screened) | # Asian Cases (Total # Screened) | # Asian Controls (Total # Screened) |
|--------------------|-----------------------|-------------|--------------------------|------------------------------------|---------------------------------|------------------------------------|----------------------------------|-------------------------------------|
| 2                  | 78155349              | c.112C>T    | p.Arg38Cys               | Affect protein function            | 1 (2691)                        | 0 (1271)                           | 0 (79)                           | 0 (190)                             |
| 2                  | 78155422              | c.185G>A    | p.Arg62Gln (rs115582620) | Tolerated                          | 8 (3284)                        | 2 (1797)                           | 0 (79)                           | 0 (190)                             |
| 3                  | 78156589              | c.349G>A    | p.Gly117Ser              | Affect protein function            | 3 <sup>b</sup> (6630)           | 0 <sup>c</sup> (4731)              | 0 (194)                          | 0 (191)                             |
| 3                  | 78156594              | c.349+5G>A  | None                     | NA                                 | 0 <sup>b</sup> (2871)           | 0 (1339)                           | 1 <sup>b</sup> (78)              | 0 (183)                             |
| 4                  | 78157775              | c.413A>C    | p.Glu138Ala              | Affect protein function            | 1 <sup>b</sup> (3488)           | 0 (1902)                           | 0 (189)                          | 0 (193)                             |
| 4                  | 78157786              | c.424G>A    | p.Glu142Lys              | Affect protein function            | 1 (4107)                        | 0 (1874)                           | 0 (187)                          | 0 (21)                              |
| 4                  | 78157787              | c.425A>G    | p.Glu142Gly              | Affect protein function            | 1 (2848)                        | 0 (1451)                           | 0 (79)                           | 0 (189)                             |
| 4                  | 78157811              | c.449T>G    | p.Leu150Arg <sup>#</sup> | Affect protein function            | 30 (6140)                       | 16 (4614)                          | 0 (183)                          | 0 (192)                             |
| 4                  | 78157873              | c.511C>A    | p.His171Asn              | Tolerated                          | 2 (4077)                        | 0 (1858)                           | 0 (183)                          | 0 (21)                              |
| 4                  | 78157888              | c.526G>C    | p.Asp176His              | Affect                             | 4 (3575)                        | 2 (1609)                           | 1 (85)                           | 0 (18)                              |

|    |          |           |                              | protein<br>function           |               |           |         |         |
|----|----------|-----------|------------------------------|-------------------------------|---------------|-----------|---------|---------|
| 4  | 78157898 | c.536G>A  | p.Arg179His                  | Tolerated                     | 2 (4061)      | 1 (1848)  | 0 (177) | 0 (20)  |
| 4  | 78157933 | c.571G>T  | p.Val191Leu                  | Tolerated                     | 1 (3575)      | 0 (1613)  | 0 (86)  | 0 (18)  |
| 4  | 78157740 | c.599G>A  | p.Ser200Asn                  | Tolerated                     | 134<br>(6163) | 75 (4624) | 2 (190) | 0 (190) |
| 6  | 78163562 | c.854A>G  | p.Asp285Gly                  | Affect<br>Protein<br>Function | 1 (2673)      | 0 (1467)  | 0 (79)  | 0 (190) |
| 13 | 78172317 | c.1778T>A | p.Ile593Asn                  | Affect<br>protein<br>function | 1 (2049)      | 1 (1039)  | 0 (128) | 0 (176) |
| 15 | 78176044 | c.2044C>T | p.Arg682Trp<br>(rs117918077) | Affect<br>protein<br>function | 58 (2169)     | 25 (1042) | 0 (116) | 0 (173) |
| 15 | 78176140 | c.2140G>A | p.Gly714Ser                  | Tolerated                     | 9 (2105)      | 3 (1038)  | 0 (132) | 0 (176) |
| 21 | 78182048 | c.2919C>G | p.Asp973Glu                  | Tolerated                     | 25 (5177)     | 12 (4099) | 0 (72)  | 0 (164) |

All coding exons of *CARD14* (full-length, *CARD14fl*) were re-sequenced in 192 psoriasis cases and 96 controls. Exons in which rare, missense mutations were identified were resequenced in an additional 95 controls. Exon 3 of *CARD14* was sequenced in an additional 194 controls of European ancestry, 145 Asian controls, and 384 psoriasis cases. Exon 4 of *CARD14* was resequenced in another 1856 cases and 882 controls of European ancestry. Numbering of *CARD14* exons is based on isoform 1 (full-length *CARD14*, RefSeq NM\_024110.3). These variants were then successfully genotyped in the numbers of cases and controls indicated. <sup>a</sup> SIFT. <sup>1</sup> <sup>b</sup>These numbers include the familial cases and *de novo* sporadic pustular case described in the text. <sup>c</sup>One control from the National Psoriasis Foundation Victor Henschel Tissue Repository (NPF) cohort, had the p.Gly117Ser mutation, but the ancestry of that individual was unknown. Eur = of Northern European ancestry.

**Table S2. Results after PLINK<sup>2</sup> Analysis for All Rare Variants Genotyped in *CARD14* in Individual Cohorts**

**A) Saint Louis/Dallas/UCSF**

| <b>Variant</b>              | <b>hg19 Position (chr17)</b> | <b>A1</b> | <b>F_A</b> | <b>F_U</b> | <b>A2</b> | <b>P</b> | <b>OR (95% CI)</b>              | <b>Cases HWE P</b> | <b>Controls HWE P</b> |
|-----------------------------|------------------------------|-----------|------------|------------|-----------|----------|---------------------------------|--------------------|-----------------------|
| rs2289539                   | 78152119                     | T         | 0.313      | 0.359      | C         | 0.0195   | 0.811 (0.681, 0.967)            | 0.848              | 0.926                 |
| rs6565643                   | 78154501                     | T         | 0.313      | 0.355      | A         | 0.0362   | 0.828 (0.694, 0.988)            | 0.847              | 1                     |
| p.Arg38Cys                  | 78155349                     | T         | 0          | 0          | C         | NA       | NA                              | NA                 | NA                    |
| rs115582620/<br>p.Arg62Gln  | 78155422                     | A         | 0.00492    | 0.00177    | G         | 0.312    | 2.021 (0.516, 7.912)            | 0.0123             | 0.000887              |
| rs9909462                   | 78156291                     | A         | 0.336      | 0.318      | G         | 0.362    | 1.088 (0.908, 1.303)            | 0.130              | 0.922                 |
| p.Gly117Ser                 | 78156589                     | A         | 0          | 0          | G         | NA       | NA                              | NA                 | NA                    |
| c.349+5G>A                  | 78156594                     | A         | 0          | 0          | G         | NA       | NA                              | NA                 | NA                    |
| rs9902358                   | 78156762                     | T         | 0.416      | 0.437      | G         | 0.290    | 0.913 (0.771, 1.081)            | 0.932              | 0.168                 |
| p.Glu138Ala                 | 78157775                     | C         | 0          | 0          | A         | NA       | NA                              | NA                 | NA                    |
| p.Glu142Lys                 | 78157786                     | A         | 0          | 0          | G         | NA       | NA                              | NA                 | NA                    |
| p.Glu142Gly                 | 78157787                     | G         | 0          | 0          | A         | NA       | NA                              | NA                 | NA                    |
| p.Leu150Arg                 | 78157811                     | G         | 0.0569     | 0          | T         | 0.998    | 1.49x10 <sup>-9</sup> (0, inf)  | 1                  | 1                     |
| p.His171Asn                 | 78157873                     | A         | 0          | 0          | C         | NA       | NA                              | NA                 | NA                    |
| p.Asp176His                 | 78157888                     | C         | 0.000856   | 0.000901   | G         | 0.971    | 0.950 (0.0593, 15.23)           | 1                  | 1                     |
| p.Arg179His                 | 78157898                     | A         | 0          | 0.000893   | G         | 0.999    | 6.20x10 <sup>-10</sup> (0, inf) | 1                  | 1                     |
| p.Val191Leu                 | 78157933                     | T         | 0          | 0          | G         | NA       | NA                              | NA                 | NA                    |
| p.Ser200Asn                 | 78157961                     | A         | 0.0159     | 0.00712    | G         | 0.0508   | 2.269 (0.997, 5.163)            | 1                  | 1                     |
| rs114688446/<br>p.Ser200Ile | 78157961                     | T         | 0          | 0          | G         | NA       | NA                              | NA                 | NA                    |
| rs4889990                   | 78158995                     | A         | 0.372      | 0.371      | G         | 0.985    | 1.002 (0.840, 1.194)            | 0.642              | 0.461                 |
| rs3829612                   | 78161402                     | T         | 0.354      | 0.345      | C         | 0.662    | 1.040 (0.871, 1.243)            | 0.312              | 0.508                 |

|                             |          |   |         |          |   |                       |                                  |        |        |
|-----------------------------|----------|---|---------|----------|---|-----------------------|----------------------------------|--------|--------|
| rs117360605/<br>p.Arg275His | 78162324 | A | 0       | 0        | G | NA                    | NA                               | NA     | NA     |
| rs8065364                   | 78162959 | C | 0.310   | 0.290    | T | 0.3029                | 1.099 (0.919, 1.314)             | 0.288  | 0.409  |
| p.Asp285Gly                 | 78163562 | G | 0       | 0        | A | NA                    | NA                               | NA     | NA     |
| rs8068433                   | 78165456 | C | 0.357   | 0.323    | T | 0.495                 | 1.148 (0.773, 1.703)             | 0.0919 | 1      |
| rs61751629/<br>p.Glu422Lys  | 78166326 | A | 0.0397  | 0.0266   | G | 0.0925                | 1.452 (0.940, 2.241)             | 0.0162 | 0.0536 |
| rs61751630/<br>p.Pro506Leu  | 78169374 | T | 0.0110  | 0.0165   | C | 0.276                 | 0.676 (0.334, 1.368)             | 1      | 0.1179 |
| rs750541                    | 78169636 | A | 0.329   | 0.332    | G | 0.879                 | 0.987 (0.829, 1.174)             | 0.925  | 0.848  |
| rs2018229                   | 78169899 | G | 0.365   | 0.377    | A | 0.680                 | 0.965 (0.813, 1.145)             | 1      | 0.647  |
| rs2066964/<br>p.Arg547Ser   | 78171944 | C | 0.361   | 0.386    | G | 0.220                 | 0.900 (0.761, 1.065)             | 0.498  | 0.202  |
| rs34367357/<br>p.Val585Ile  | 78172292 | A | 0.0897  | 0.0574   | G | 0.00219               | 1.657 (1.199, 2.288)             | 0.0507 | 0.700  |
| p.Ile593Asn                 | 78172317 | A | 0       | 0.000890 | T | 0.999                 | 5.50 x10 <sup>-10</sup> (0, inf) | 1      | 1      |
| rs73429414/<br>p.Arg597Trp  | 78172328 | T | 0       | 0        | C | NA                    | NA                               | NA     | NA     |
| rs2304856                   | 78175483 | T | 0.513   | 0.434    | C | 0.000161              | 1.388 (1.171, 1.646)             | 0.403  | 0.727  |
| rs3813063                   | 78175854 | A | 0.437   | 0.527    | C | 1.85x10 <sup>-5</sup> | 0.694 (0.588, 0.821)             | 1      | 0.671  |
| rs117918077/<br>p.Arg682Trp | 78176044 | T | 0.0135  | 0.0106   | C | 0.518                 | 1.276 (0.609, 2.672)             | 1      | 1      |
| p.Gly714Ser                 | 78176140 | A | 0.00226 | 0.000899 | G | 0.424                 | 2.523 (0.262, 24.32)             | 1      | 1      |
| rs34822755/<br>p.Cys756Tyr  | 78177668 | A | 0       | 0.000890 | G | 0.999                 | 5.21 x10 <sup>-10</sup> (0, inf) | 1      | 1      |
| rs4889997                   | 78178189 | A | 0.444   | 0.525    | G | 0.000154              | 0.720 (0.607, 0.853)             | 1      | 0.932  |
| rs11653893                  | 78178830 | G | 0.419   | 0.517    | A | 2.75x10 <sup>-6</sup> | 0.665 (0.560, 0.788)             | 0.667  | 0.496  |
| rs11652075/<br>p.Arg820Trp  | 78178893 | T | 0.381   | 0.482    | C | 1.28x10 <sup>-6</sup> | 0.663 (0.562, 0.783)             | 0.306  | 0.797  |
| rs2289541/                  | 78179408 | A | 0       | 0        | G | NA                    | NA                               | NA     | NA     |

|             |          |   |   |   |   |    |    |    |    |
|-------------|----------|---|---|---|---|----|----|----|----|
| p.Arg883His |          |   |   |   |   |    |    |    |    |
| p.Asp973Glu | 78182048 | G | 0 | 0 | C | NA | NA | NA | NA |

### B) National Psoriasis Foundation

| Variant                     | hg19 Position (chr17) | A1 | F_A      | F_U     | A2 | P      | OR (95% CI)                    | Cases HWE P | Controls HWE P |
|-----------------------------|-----------------------|----|----------|---------|----|--------|--------------------------------|-------------|----------------|
| rs2289539                   | 78152119              | T  | 0.309    | 0.328   | C  | 0.522  | 0.911 (0.684, 1.212)           | 0.0332      | 1              |
| rs6565643                   | 78154501              | T  | 0.305    | 0.324   | A  | 0.521  | 0.910 (0.682, 1.214)           | 0.0306      | 1              |
| p.Arg38Cys                  | 78155349              | T  | 0        | 0       | C  | NA     | NA                             | NA          | NA             |
| rs115582620/<br>p.Arg62Gln  | 78155422              | A  | 0.00111  | 0.00345 | G  | 0.423  | 0.321 (0.0200, 5.172)          | 1           | 1              |
| rs9909462                   | 78156291              | A  | 0.363    | 0.320   | G  | 0.235  | 1.227 (0.876, 1.720)           | 0.173       | 0.526          |
| p.Gly117Ser                 | 78156589              | A  | 0.00105  | 0       | G  | 0.999  | 5.17x10 <sup>8</sup> (0, inf)  | 1           | 1              |
| c.349+5G>A                  | 78156594              | A  | 0        | 0       | G  | NA     | NA                             | NA          | NA             |
| rs9902358                   | 78156762              | T  | 0.450    | 0.389   | G  | 0.0660 | 1.290 (0.983, 1.692)           | 0.781       | 1              |
| p.Glu138Ala                 | 78157775              | C  | 0        | 0       | A  | NA     | NA                             | NA          | NA             |
| p.Glu142Lys                 | 78157786              | A  | 0        | 0       | G  | NA     | NA                             | NA          | NA             |
| p.Glu142Gly                 | 78157787              | G  | 0        | 0       | A  | NA     | NA                             | NA          | NA             |
| p.Leu150Arg                 | 78157811              | G  | 0.00226  | 0       | T  | 0.999  | 5.14 x10 <sup>8</sup> (0, inf) | 1           | 1              |
| p.His171Asn                 | 78157873              | A  | 0        | 0       | C  | NA     | NA                             | NA          | NA             |
| p.Asp176His                 | 78157888              | C  | 0.001538 | 0       | G  | 0.999  | 6.18x10 <sup>8</sup> (0, inf)  | 1           | 1              |
| p.Arg179His                 | 78157898              | A  | 0        | 0       | G  | NA     | NA                             | NA          | NA             |
| p.Val191Leu                 | 78157933              | T  | 0        | 0       | G  | NA     | NA                             | NA          | NA             |
| p.Ser200Asn                 | 78157961              | A  | 0.0116   | 0.0132  | G  | 0.822  | 0.875 (0.275, 2.79)            | 1           | 1              |
| rs114688446/<br>p.Ser200Ile | 78157961              | T  | 0        | 0       | G  | NA     | NA                             | NA          | NA             |
| rs4889990                   | 78158995              | A  | 0.323    | 0.376   | G  | 0.165  | 0.799 (0.583, 1.097)           | 0.280       | 0.841          |

|                             |          |   |         |         |   |        |                       |       |        |
|-----------------------------|----------|---|---------|---------|---|--------|-----------------------|-------|--------|
| rs3829612                   | 78161402 | T | 0.377   | 0.339   | C | 0.305  | 1.181 (0.860, 1.621)  | 0.904 | 1      |
| rs117360605/<br>p.Arg275His | 78162324 | A | 0       | 0       | G | NA     | NA                    | NA    | NA     |
| rs8065364                   | 78162959 | C | 0.324   | 0.296   | T | 0.354  | 1.138 (0.866, 1.497)  | 0.756 | 0.0822 |
| p.Asp285Gly                 | 78163562 | G | 0       | 0       | A | NA     | NA                    | NA    | NA     |
| rs8068433                   | 78165456 | C | 0.328   | 0.324   | T | 0.924  | 1.021 (0.668, 1.559)  | 0.741 | 0.404  |
| rs61751629/<br>p.Glu422Lys  | 78166326 | A | 0.0388  | 0.0362  | G | 0.837  | 1.074 (0.542, 2.131)  | 0.516 | 1      |
| rs61751630/<br>p.Pro506Leu  | 78169374 | T | 0.0133  | 0.0109  | C | 0.749  | 1.233 (0.343, 4.433)  | 1     | 1      |
| rs750541                    | 78169636 | A | 0.363   | 0.292   | G | 0.0232 | 1.386 (1.046, 1.838)  | 0.555 | 0.701  |
| rs2018229                   | 78169899 | G | 0.416   | 0.345   | A | 0.0306 | 1.342 (1.028, 1.751)  | 0.575 | 0.723  |
| rs2066964/<br>p.Arg547Ser   | 78171944 | C | 0.375   | 0.421   | G | 0.171  | 0.829 (0.633, 1.084)  | 0.622 | 0.729  |
| rs34367357/<br>p.Val585Ile  | 78172292 | A | 0.0835  | 0.0709  | G | 0.481  | 1.208 (0.714, 2.043)  | 0.235 | 1      |
| p.Ile593Asn                 | 78172317 | A | 0       | 0       | T | NA     | NA                    | NA    | NA     |
| rs73429414/<br>p.Arg597Trp  | 78172328 | T | 0       | 0       | C | NA     | NA                    | NA    | NA     |
| rs2304856                   | 78175483 | T | 0.461   | 0.487   | C | 0.485  | 0.896 (0.657, 1.220)  | 1     | 0.0420 |
| rs3813063                   | 78175854 | A | 0.499   | 0.458   | C | 0.200  | 1.188 (0.913, 1.545)  | 0.785 | 0.196  |
| rs117918077/<br>p.Arg682Trp | 78176044 | T | 0.0126  | 0.0197  | C | 0.358  | 0.627 (0.231, 1.699)  | 1     | 1      |
| p.Gly714Ser                 | 78176140 | A | 0.00105 | 0.00662 | G | 0.131  | 0.157 (0.0141, 1.738) | 1     | 1      |
| rs34822755/<br>p.Cys756Tyr  | 78177668 | A | 0       | 0       | G | NA     | NA                    | NA    | NA     |
| rs4889997                   | 78178189 | A | 0.497   | 0.458   | G | 0.223  | 1.177 (0.906, 1.531)  | 0.856 | 0.254  |
| rs11653893                  | 78178830 | G | 0.495   | 0.451   | A | 0.177  | 1.198 (0.922, 1.558)  | 0.785 | 0.330  |
| rs11652075/<br>p.Arg820Trp  | 78178893 | T | 0.464   | 0.443   | C | 0.524  | 1.089 (0.837, 1.418)  | 1     | 0.741  |

|                           |          |   |         |         |   |       |                       |    |    |
|---------------------------|----------|---|---------|---------|---|-------|-----------------------|----|----|
| rs2289541/<br>p.Arg883His | 78179408 | A | 0.00105 | 0.00329 | G | 0.418 | 0.317 (0.0197, 5.102) | 1  | 1  |
| p.Asp973Glu               | 78182048 | G | 0       | 0       | C | NA    | NA                    | NA | NA |

### B) Utah

| Variant                     | hg19<br>Position<br>(chr17) | A1 | F_A      | F_U      | A2 | P                     | OR (95% CI)                     | Cases HWE<br>P         | Controls<br>HWE P     |
|-----------------------------|-----------------------------|----|----------|----------|----|-----------------------|---------------------------------|------------------------|-----------------------|
| rs2289539                   | 78152119                    | T  | 0.419    | 0.298    | C  | $4.70 \times 10^{-9}$ | 2.529 (1.854, 3.449)            | $3.59 \times 10^{-55}$ | 0.000192              |
| rs6565643                   | 78154501                    | T  | 0.154    | 0.197    | A  | 0.0677                | 0.758 (0.564, 1.020)            | 0.00169                | 0.138                 |
| p.Arg38Cys                  | 78155349                    | T  | 0        | 0        | C  | NA                    | NA                              | NA                     | NA                    |
| rs115582620/<br>p.Arg62Gln  | 78155422                    | A  | 0.000544 | 0        | G  | 0.999                 | $4.15 \times 10^8$ (0, inf)     | 1                      | 1                     |
| rs9909462                   | 78156291                    | A  | 0.321    | NA       | G  | 1                     | 1 (0, inf)                      | $1.65 \times 10^{-9}$  | NA                    |
| p.Gly117Ser                 | 78156589                    | A  | 0.000543 | 0        | G  | 0.999                 | $4.04 \times 10^{-8}$ (0, inf)  | 1                      | 1                     |
| c.349+5G>A                  | 78156594                    | A  | 0        | 0        | G  | NA                    | NA                              | NA                     | NA                    |
| rs9902358                   | 78156762                    | T  | 0.426    | 0.500    | G  | 0.00282               | 0.654 (0.495, 0.864)            | $1.02 \times 10^{-13}$ | $9.50 \times 10^{-6}$ |
| p.Glu138Ala                 | 78157775                    | C  | 0        | 0        | A  | NA                    | NA                              | NA                     | NA                    |
| p.Glu142Lys                 | 78157786                    | A  | 0        | 0        | G  | NA                    | NA                              | NA                     | NA                    |
| p.Glu142Gly                 | 78157787                    | G  | 0        | 0        | A  | NA                    | NA                              | NA                     | NA                    |
| p.Leu150Arg                 | 78157811                    | G  | 0.00110  | 0        | T  | 0.999                 | $4.14 \times 10^8$ (0, inf)     | 1                      | 1                     |
| p.His171Asn                 | 78157873                    | A  | 0        | 0        | C  | NA                    | NA                              | NA                     | NA                    |
| p.Asp176His                 | 78157888                    | C  | 0.000786 | 0        | G  | 1                     | 1 (0, inf)                      | 1                      | NA                    |
| p.Arg179His                 | 78157898                    | A  | 0        | 0        | G  | NA                    | NA                              | NA                     | NA                    |
| p.Val191Leu                 | 78157933                    | T  | 0        | 0        | G  | NA                    | NA                              | NA                     | NA                    |
| p.Ser200Asn                 | 78157961                    | A  | 0.00926  | 0.002183 | G  | 0.157                 | 4.302 (0.570, 32.49)            | 1                      | 1                     |
| rs114688446/<br>p.Ser200Ile | 78157961                    | T  | 0        | 0.002137 | G  | 0.999                 | $1.68 \times 10^{-10}$ (0, inf) | 1                      | 1                     |
| rs4889990                   | 78158995                    | A  | 0.345    | NA       | G  | 1                     | 1 (0, inf)                      | 0.000970               | NA                    |



|                             |          |   |         |        |   |        |                                |                        |                        |
|-----------------------------|----------|---|---------|--------|---|--------|--------------------------------|------------------------|------------------------|
| rs3829612                   | 78161402 | T | 0.329   | NA     | C | 1      | 1 (0, inf)                     | 5.75x10 <sup>-8</sup>  | NA                     |
| rs117360605/<br>p.Arg275His | 78162324 | A | 0       | 0      | G | NA     | NA                             | NA                     | NA                     |
| rs8065364                   | 78162959 | C | 0.299   | 0.308  | T | 0.694  | 0.945 (0.713, 1.252)           | 2.00x10 <sup>-12</sup> | 3.14x10 <sup>-5</sup>  |
| p.Asp285Gly                 | 78163562 | G | 0       | 0      | A | NA     | NA                             | NA                     | NA                     |
| rs8068433                   | 78165456 | C | 0.355   | NA     | T | 1      | 1 (0, inf)                     | 0.438                  | NA                     |
| rs61751629/<br>p.Glu422Lys  | 78166326 | A | 0.0267  | 0.0393 | G | 0.1598 | 0.678 (0.395, 1.165)           | 0.482                  | 0.294                  |
| rs61751630/<br>p.Pro506Leu  | 78169374 | T | 0.020   | 0.0313 | C | 0.2766 | 0.645 (0.292, 1.422)           | 1                      | 0.107                  |
| rs750541                    | 78169636 | A | 0.368   | 0.359  | G | 0.674  | 1.059 (0.810, 1.385)           | 1.09x10 <sup>-18</sup> | 0.000238               |
| rs2018229                   | 78169899 | G | 0.401   | 0.382  | A | 0.401  | 1.139 (0.841, 1.541)           | 2.32x10 <sup>-29</sup> | 5.93x10 <sup>-9</sup>  |
| rs2066964/<br>p.Arg547Ser   | 78171944 | C | 0.371   | 0.405  | G | 0.190  | 0.868 (0.703, 1.072)           | 0.429                  | 0.781                  |
| rs34367357/<br>p.Val585Ile  | 78172292 | A | 0.0781  | 0.0575 | G | 0.1437 | 1.374 (0.897, 2.104)           | 0.242                  | 0.534                  |
| p.Ile593Asn                 | 78172317 | A | 0       | 0      | T | NA     | NA                             | NA                     | NA                     |
| rs73429414/<br>p.Arg597Trp  | 78172328 | T | 0       | 0      | C | NA     | NA                             | NA                     | NA                     |
| rs2304856                   | 78175483 | T | 0.439   | NA     | C | 1      | 1 (0, inf)                     | 0.00019                | NA                     |
| rs3813063                   | 78175854 | C | 0.498   | 0.457  | A | 0.0681 | 1.287 (0.982, 1.687)           | 6.87x10 <sup>-27</sup> | 0.000598               |
| rs117918077/<br>p.Arg682Trp | 78176044 | T | 0.0131  | 0.0108 | C | 0.697  | 1.213 (0.458, 3.215)           | 1                      | 1                      |
| p.Gly714Ser                 | 78176140 | A | 0.00217 | 0      | G | 0.999  | 4.04x10 <sup>-8</sup> (0, inf) | 1                      | 1                      |
| rs34822755/<br>p.Cys756Tyr  | 78177668 | A | 0       | 0      | G | NA     | NA                             | NA                     | NA                     |
| rs4889997                   | 78178189 | A | 0.472   | 0.517  | G | 0.0824 | 0.795 (0.613, 1.030)           | 3.44x10 <sup>-13</sup> | 0.179                  |
| rs11653893                  | 78178830 | G | 0.484   | 0.470  | A | 0.470  | 1.127 (0.814, 1.561)           | 7.02x10 <sup>-60</sup> | 1.61x10 <sup>-06</sup> |
| rs11652075/<br>p.Arg820Trp  | 78178893 | T | 0.453   | 0.515  | C | 0.0166 | 0.778 (0.633, 0.955)           | 0.342                  | 0.361                  |

|                           |          |   |         |         |   |       |                                |   |   |
|---------------------------|----------|---|---------|---------|---|-------|--------------------------------|---|---|
| rs2289541/<br>p.Arg883His | 78179408 | A | 0.00109 | 0       | G | 0.999 | 4.04x10 <sup>-8</sup> (0, inf) | 1 | 1 |
| p.Asp973Glu               | 78182048 | G | 0.00443 | 0.00219 | C | 0.514 | 2.027 (0.243, 16.93)           | 1 | 1 |

### C) Michigan

| Variant     | hg19<br>Position<br>(chr17) | A1 | F_A     | F_U     | A2 | P      | OR (95% CI)          | Cases<br>HWE P | Controls<br>HWE P |
|-------------|-----------------------------|----|---------|---------|----|--------|----------------------|----------------|-------------------|
| p.Gly117Ser | 78156589                    | A  | 0       | 0       | G  | NA     | NA                   | NA             | NA                |
| p.Leu150Arg | 78157811                    | G  | 0.00235 | 0.00238 | T  | 0.976  | 0.988 (0.457, 2.135) | 1              | 1                 |
| p.Ser200Asn | 78157961                    | A  | 0.0114  | 0.00968 | G  | 0.370  | 1.184 (0.818, 1.713) | 1              | 1                 |
| rs2066964   | 78171944                    | C  | 0.377   | 0.384   | G  | 0.469  | 0.972 (0.909, 1.049) | 0.155          | 0.257             |
| rs11652075  | 78178893                    | T  | 0.470   | 0.492   | C  | 0.0233 | 0.917 (0.851, 0.988) | 0.565          | 1                 |
| p.Asp973Glu | 78182048                    | G  | 0.00235 | 0.00164 | C  | 0.406  | 1.434 (0.612, 3.361) | 1              | 1                 |

### D) Newfoundland

| Variant                    | hg19<br>Position<br>(chr17) | A1 | F_A   | F_U   | A2 | P     | OR (95% CI)          | Cases<br>HWE P | Controls<br>HWE P |
|----------------------------|-----------------------------|----|-------|-------|----|-------|----------------------|----------------|-------------------|
| rs2289539                  | 78152119                    | T  | 0.328 | 0.349 | C  | 0.370 | 0.901 (0.718, 1.131) | 0.0545         | 0.172             |
| rs6565643                  | 78154501                    | T  | 0.327 | 0.333 | A  | 0.796 | 0.970 (0.769, 1.223) | 0.0892         | 0.152             |
| p.Arg38Cys                 | 78155349                    | T  | 0     | 0     | C  | NA    | NA                   | NA             | NA                |
| rs115582620/<br>p.Arg62Gln | 78155422                    | A  | 0     | 0     | G  | NA    | NA                   | NA             | NA                |
| rs9909462                  | 78156291                    | A  | 0.331 | 0.317 | G  | 0.560 | 1.068 (0.113, 0.856) | 0.336          | 0.806             |
| p.Gly117Ser                | 78156589                    | A  | 0     | 0     | G  | NA    | NA                   | NA             | NA                |
| c.349+5G>A                 | 78156594                    | G  | 0     | 0     | A  | NA    | NA                   | NA             | NA                |
| rs9902358                  | 78156762                    | T  | 0.413 | 0.389 | G  | 0.343 | 1.112 (0.893, 1.384) | 1              | 0.317             |

|                             |          |   |         |         |   |        |                               |         |        |
|-----------------------------|----------|---|---------|---------|---|--------|-------------------------------|---------|--------|
| p.Glu138Ala                 | 78157775 | C | 0       | 0       | A | NA     | NA                            | NA      | NA     |
| p.Glu142Lys                 | 78157786 | A | 0       | 0       | G | NA     | NA                            | NA      | NA     |
| p.Glu142Gly                 | 78157787 | G | 0       | 0       | A | NA     | NA                            | NA      | NA     |
| p.Leu150Arg                 | 78157811 | G | 0.00274 | 0.00134 | T | 0.557  | 2.055 (0.186, 22.76)          | 1       | 1      |
| p.His171Asn                 | 78157873 | A | 0.00408 | 0       | C | 0.999  | 4.19x10 <sup>8</sup> (0, inf) | 0.00408 | 1      |
| p.Asp176His                 | 78157888 | C | 0       | 0       | G | NA     | NA                            | NA      | NA     |
| p.Arg179His                 | 78157898 | A | 0       | 0       | G | NA     | NA                            | NA      | NA     |
| p.Val191Leu                 | 78157933 | T | 0       | 0       | G | NA     | NA                            | NA      | NA     |
| p.Ser200Asn                 | 78157961 | A | 0.0110  | 0.00401 | G | 0.132  | 2.787 (0.734, 10.59)          | 1       | 1      |
| rs114688446/<br>p.Ser200Ile | 78157961 | T | 0       | 0       | G | NA     | NA                            | NA      | NA     |
| rs4889990                   | 78158995 | A | 0.339   | 0.376   | G | 0.144  | 0.852 (0.686, 1.056)          | 0.0972  | 0.368  |
| rs3829612                   | 78161402 | T | 0.356   | 0.336   | C | 0.431  | 1.089 (0.881, 1.347)          | 0.168   | 0.636  |
| rs117360605/<br>p.Arg275His | 78162324 | A | 0       | 0       | G | NA     | NA                            | NA      | NA     |
| rs8065364                   | 78162959 | C | 0.333   | 0.293   | T | 0.101  | 1.204 (0.965, 1.504)          | 1       | 0.802  |
| p.Asp285Gly                 | 78163562 | G | 0       | 0       | A | NA     | NA                            | NA      | NA     |
| rs8068433                   | 78165456 | C | 0.380   | 0.332   | T | 0.190  | 1.234 (0.901, 1.692)          | 0.1037  | 0.0414 |
| rs61751629/<br>p.Glu422Lys  | 78166326 | A | 0.0415  | 0.0430  | G | 0.890  | 0.9641 (0.573, 1.623)         | 0.443   | 1      |
| rs750541                    | 78169636 | A | 0.357   | 0.319   | G | 0.124  | 1.190 (0.954, 1.484)          | 0.909   | 0.337  |
| rs2018229                   | 78169899 | G | 0.411   | 0.352   | A | 0.0189 | 1.306 (1.045, 1.631)          | 0.580   | 0.201  |
| rs2066964/<br>p.Arg547Ser   | 78171944 | C | 0.376   | 0.358   | G | 0.497  | 1.078 (0.868, 1.339)          | 0.481   | 0.214  |
| rs34367357/<br>p.Val585Ile  | 78172292 | A | 0.0861  | 0.0856  | G | 0.973  | 1.007 (0.689, 1.471)          | 0.491   | 1      |
| rs2304856                   | 78175483 | T | 0.469   | 0.460   | C | 0.745  | 1.035 (0.843, 1.271)          | 0.396   | 0.593  |
| rs3813063                   | 78175854 | A | 0.493   | 0.487   | C | 0.803  | 1.027 (0.835, 1.263)          | 0.597   | 1      |
| rs4889997                   | 78178189 | A | 0.496   | 0.489   | G | 0.800  | 1.027 (0.836, 1.263)          | 0.672   | 0.676  |

|                            |          |   |         |         |   |       |                          |       |       |
|----------------------------|----------|---|---------|---------|---|-------|--------------------------|-------|-------|
| rs11653893                 | 78178830 | G | 0.484   | 0.484   | A | 0.992 | 1.001 (0.814, 1.232)     | 0.668 | 0.756 |
| rs11652075/<br>p.Arg820Trp | 78178893 | T | 0.503   | 0.487   | C | 0.546 | 1.065 (0.868, 1.306)     | 0.744 | 0.254 |
| p.Asp973Glu                | 78182048 | G | 0.00141 | 0.00151 | C | 0.962 | 0.935 (0.0583,<br>15.01) | 1     | 1     |

### E) Toronto

| Variant                    | hg19<br>Position<br>(chr17) | A1 | F_A      | F_U     | A2 | P     | OR (95% CI)                   | Cases<br>HWE P | Controls<br>HWE P |
|----------------------------|-----------------------------|----|----------|---------|----|-------|-------------------------------|----------------|-------------------|
| rs2289539                  | 78152119                    | T  | 0.337    | 0.341   | C  | 0.840 | 0.983 (0.832, 1.161)          | 0.345          | 0.919             |
| rs6565643                  | 78154501                    | T  | 0.336    | 0.336   | A  | 0.996 | 1 (0.845, 1.184)              | 0.423          | 0.917             |
| p.Arg38Cys                 | 78155349                    | T  | 0        | 0       | C  | NA    | NA                            | NA             | NA                |
| rs115582620/<br>p.Arg62Gln | 78155422                    | A  | 0        | 0       | G  | NA    | NA                            | NA             | NA                |
| rs9909462                  | 78156291                    | A  | 0.330    | 0.341   | G  | 0.539 | 0.949 (0.804, 1.121)          | 0.941          | 0.176             |
| p.Gly117Ser                | 78156589                    | A  | 0        | 0       | G  | NA    | NA                            | NA             | NA                |
| c.349+5G>A                 | 78156594                    | A  | 0        | 0       | G  | NA    | NA                            | NA             | NA                |
| rs9902358                  | 78156762                    | T  | 0.450    | 0.451   | G  | 0.956 | 0.996 (0.852, 1.163)          | 0.598          | 0.401             |
| p.Glu138Ala                | 78157775                    | C  | 0        | 0       | A  | NA    | NA                            | NA             | NA                |
| p.Glu142Lys                | 78157786                    | A  | 0        | 0       | G  | NA    | NA                            | NA             | NA                |
| p.Glu142Gly                | 78157787                    | G  | 0        | 0       | A  | NA    | NA                            | NA             | NA                |
| p.Leu150Arg                | 78157811                    | G  | 0.00155  | 0.00210 | T  | 0.740 | 0.738 (0.123, 4.434)          | 1              | 1                 |
| p.His171Asn                | 78157873                    | A  | 0        | 0       | C  | NA    | NA                            | NA             | NA                |
| p.Asp176His                | 78157888                    | C  | 0.000529 | 0.00105 | G  | 0.626 | 0.502 (0.0313, 8.045)         | 1              | 1                 |
| p.Arg179His                | 78157898                    | A  | 0.00105  | 0       | G  | 0.999 | 7.76x10 <sup>8</sup> (0, inf) | 1              | 1                 |
| p.Val191Leu                | 78157933                    | T  | 0.000540 | 0       | G  | 0.999 | 8.26x10 <sup>8</sup> (0, inf) | 1              | 1                 |

|                             |          |   |         |         |   |         |                                |        |         |
|-----------------------------|----------|---|---------|---------|---|---------|--------------------------------|--------|---------|
| p.Ser200Asn                 | 78157961 | A | 0.00722 | 0.00632 | G | 0.783   | 1.145 (0.437, 2.998)           | 1      | 1       |
| rs114688446/<br>p.Ser200Ile | 78157961 | T | 0       | 0       | G | NA      | NA                             | NA     | NA      |
| rs4889990                   | 78158995 | A | 0.371   | 0.353   | G | 0.364   | 1.078 (0.917, 1.268)           | 0.290  | 0.542   |
| rs3829612                   | 78161402 | T | 0.355   | 0.359   | C | 0.849   | 0.984 (0.836, 1.159)           | 1      | 0.158   |
| rs117360605/<br>p.Arg275His | 78162324 | A | 0       | 0.00213 | G | 0.999   | 1.73x10 <sup>-5</sup> (0, inf) | 1      | 0.00107 |
| rs8065364                   | 78162959 | C | 0.312   | 0.303   | T | 0.653   | 1.039 (0.879, 1.228)           | 0.707  | 0.517   |
| p.Asp285Gly                 | 78163562 | G | 0       | 0       | A | NA      | NA                             | NA     | NA      |
| rs8068433                   | 78165456 | C | 0.339   | 0.328   | T | 0.664   | 1.051 (0.838, 1.319)           | 0.291  | 0.766   |
| rs61751629/<br>p.Glu422Lys  | 78166326 | A | 0.0377  | 0.0398  | G | 0.788   | 0.947 (0.640, 1.404)           | 0.642  | 0.164   |
| rs750541                    | 78169636 | A | 0.353   | 0.341   | G | 0.557   | 1.049 (0.894, 1.231)           | 0.260  | 0.102   |
| rs2018229                   | 78169899 | G | 0.380   | 0.376   | A | 0.838   | 1.017 (0.865, 1.197)           | 0.945  | 0.842   |
| rs2066964/<br>p.Arg547Ser   | 78171944 | C | 0.369   | 0.390   | G | 0.285   | 0.918 (0.784, 1.074)           | 0.0151 | 0.209   |
| rs34367357/<br>p.Val585Ile  | 78172292 | A | 0.0859  | 0.0872  | G | 0.909   | 0.984 (0.748, 1.294)           | 0.683  | 0.772   |
| rs2304856                   | 78175483 | T | 0.507   | 0.460   | C | 0.0222  | 1.202 (1.027, 1.406)           | 0.551  | 0.398   |
| rs3813063                   | 78175854 | A | 0.459   | 0.524   | C | 0.00116 | 0.772 (0.660, 0.902)           | 0.697  | 0.356   |
| rs4889997                   | 78178189 | A | 0.456   | 0.522   | G | 0.00131 | 0.771 (0.658, 0.904)           | 0.741  | 0.303   |
| rs11653893                  | 78178830 | G | 0.443   | 0.476   | A | 0.104   | 0.874 (0.742, 1.028)           | 0.289  | 0.924   |
| rs11652075/<br>p.Arg820Trp  | 78178893 | T | 0.459   | 0.517   | C | 0.00364 | 0.795 (0.681, 0.9279)          | 0.846  | 0.233   |
| p.Asp973Glu                 | 78182048 | G | 0.00160 | 0.00111 | C | 0.975   | 0.962 (0.0870, 10.63)          | 1      | 1       |

**G) Asians**

| <b>Variant</b> | <b>hg19<br/>Position<br/>(chr17)</b> | <b>A1</b> | <b>F_A</b> | <b>F_U</b> | <b>A2</b> | <b>P</b> | <b>OR (95% CI)</b> | <b>Cases<br/>HWE P</b> | <b>Controls<br/>HWE P</b> |
|----------------|--------------------------------------|-----------|------------|------------|-----------|----------|--------------------|------------------------|---------------------------|
|----------------|--------------------------------------|-----------|------------|------------|-----------|----------|--------------------|------------------------|---------------------------|

|                             |          |   |          |         |   |       |                                 |       |       |
|-----------------------------|----------|---|----------|---------|---|-------|---------------------------------|-------|-------|
| rs2289539                   | 78152119 | T | 0.392    | 0.400   | C | 0.918 | 0.965 (0.493, 1.892)            | 0.877 | 0.385 |
| rs6565643                   | 78154501 | T | 0.376    | 0.375   | A | 0.994 | 1.003 (0.486, 2.072)            | 0.202 | 0.319 |
| p.Arg38Cys                  | 78155349 | T | 0        | 0       | C | NA    | NA                              | NA    | NA    |
| rs115582620/<br>p.Arg62Gln  | 78155422 | A | 0        | 0.00260 | G | 0.999 | 6.29x10 <sup>-10</sup> (0, inf) | 1     | 1     |
| rs9909462                   | 78156291 | A | 0.244    | 0.294   | G | 0.513 | 0.744 (0.307, 1.804)            | 0.374 | 1     |
| p.Gly117Ser                 | 78156589 | A | 0        | 0       | G | NA    | NA                              | NA    | NA    |
| c.349+5G>A                  | 78156594 | A | 0.0128   | 0       | G | NA    | NA                              | NA    | NA    |
| rs9902358                   | 78156762 | T | 0.347    | 0.375   | G | 0.718 | 0.882 (0.445, 1.748)            | 0.617 | 0.339 |
| p.Glu138Ala                 | 78157775 | C | 0        | 0       | A | NA    | NA                              | NA    | NA    |
| p.Glu142Lys                 | 78157786 | A | 0        | 0       | G | NA    | NA                              | NA    | NA    |
| p.Glu142Gly                 | 78157787 | G | 0        | 0       | A | NA    | NA                              | NA    | NA    |
| p.Leu150Arg                 | 78157811 | G | 0        | 0       | T | NA    | NA                              | NA    | NA    |
| p.His171Asn                 | 78157873 | A | 0        | 0       | C | NA    | NA                              | NA    | NA    |
| p.Asp176His                 | 78157888 | C | 0.005814 | 0       | G | 0.999 | 3.42x10 <sup>8</sup> (0, inf)   | 1     | 1     |
| p.Arg179His                 | 78157898 | A | 0        | 0       | G | NA    | NA                              | NA    | NA    |
| p.Val191Leu                 | 78157933 | T | 0        | 0       | G | NA    | NA                              | NA    | NA    |
| p.Ser200Asn                 | 78157961 | A | 0.00521  | 0       | G | 0.999 | 1.62x10 <sup>9</sup> (0, inf)   | 1     | 1     |
| rs114688446/<br>p.Ser200Ile | 78157961 | T | 0        | 0       | G | NA    | NA                              | NA    | NA    |
| rs4889990                   | 78158995 | A | 0.383    | 0.265   | G | 0.225 | 1.633 (0.739, 3.609)            | 0.469 | 0.525 |
| rs3829612                   | 78161402 | T | 0.259    | 0.324   | C | 0.439 | 0.7266 (0.324, 1.631)           | 1     | 1     |
| rs117360605/<br>p.Arg275His | 78162324 | A | 0        | 0       | G | NA    | NA                              | NA    | NA    |
| rs8065364                   | 78162959 | C | 0.213    | 0.262   | T | 0.472 | 0.765 (0.369, 1.587)            | 1     | 0.578 |
| p.Asp285Gly                 | 78163562 | G | 0        | 0       | A | NA    | NA                              | NA    | NA    |
| rs8068433                   | 78165456 | C | 0.436    | 0.250   | T | 0.244 | 2.283 (0.570, 9.145)            | 0.748 | 1     |
| rs61751629/<br>p.Glu422Lys  | 78166326 | A | 0.00262  | 0.00262 | G | 1     | 1 (0.06209, 16.1)               | 1     | 1     |
| rs61751630/<br>p.Glu422Lys  | 78169374 | T | 0.00417  | 0       | C | 0.999 | 2.17x10 <sup>9</sup> (0, inf)   | 1     | 1     |

|                             |          |   |        |        |   |         |                      |        |       |
|-----------------------------|----------|---|--------|--------|---|---------|----------------------|--------|-------|
| p.Pro506Leu                 |          |   |        |        |   |         |                      |        |       |
| rs750541                    | 78169636 | A | 0.361  | 0.262  | G | 0.167   | 1.729 (0.795, 3.758) | 0.0371 | 1     |
| rs2018229                   | 78169899 | G | 0.361  | 0.350  | A | 0.886   | 1.055 (0.509, 2.187) | 0.141  | 1     |
| rs2066964/<br>p.Arg547Ser   | 78171944 | C | 0.356  | 0.437  | G | 0.0252  | 0.707 (0.522, 0.958) | 0.523  | 0.357 |
| rs34367357/<br>p.Val585Ile  | 78172292 | A | 0.0812 | 0.0767 | G | 0.820   | 1.064 (0.625, 1.809) | 1      | 1     |
| p.Ile593Asn                 | 78172317 | A | 0      | 0      | T | NA      | NA                   | NA     | NA    |
| rs73429414/<br>p.Arg597Trp  | 78172328 | T | 0      | 0      | C | NA      | NA                   | NA     | NA    |
| rs2304856                   | 78175483 | T | 0.355  | 0.472  | C | 0.192   | 0.610 (0.290, 1.281) | 1      | 1     |
| rs3813063                   | 78175854 | C | 0.354  | 0.333  | A | 0.788   | 1.099 (0.552, 2.191) | 0.745  | 1     |
| rs117918077/<br>p.Arg682Trp | 78176044 | T | 0      | 0      | C | NA      | NA                   | NA     | NA    |
| p.Gly714Ser                 | 78176140 | A | 0      | 0      | G | NA      | NA                   | NA     | NA    |
| rs34822755/<br>p.Cys756Tyr  | 78177668 | A | 0      | 0      | G | NA      | NA                   | NA     | NA    |
| rs4889997                   | 78178189 | A | 0.361  | 0.368  | G | 0.931   | 0.969 (0.474, 1.981) | 0.618  | 1     |
| rs11653893                  | 78178830 | G | 0.368  | 0.310  | A | 0.440   | 1.327 (0.648, 2.717) | 0.429  | 0.611 |
| rs11652075/<br>p.Arg820Trp  | 78178893 | T | 0.322  | 0.431  | C | 0.00287 | 0.639 (0.476, 0.858) | 0.739  | 0.138 |
| rs2289541/<br>p.Arg883His   | 78179408 | A | 0.0644 | 0.0739 | G | 0.644   | 0.860 (0.327, 0.453) | 1      | 1     |
| p.Asp973Glu                 | 78182048 | G | 0      | 0      | C | NA      | NA                   | NA     | NA    |

Cases and controls were genotyped by Sequenom MassARRAY or TaqMan (Michigan cohort only). Results are shown for seven sets of case-control logistic regression analyses of genotypes (unless otherwise specified, cohorts were of European ancestry): A) Saint Louis/Dallas/UCSF (676 cases, 570 controls), B) National Psoriasis Foundation (486 cases, 154 controls), C) Utah (931 cases, 236 controls), D) Michigan (2768 cases, 2749 controls), E) Newfoundland (340 cases, 379 controls), F) Toronto (981 cases, 483 controls), G) Asian (194 cases, 193 controls). A1 – minor/mutant allele, A2 –major/wildtype allele, F\_A – frequency of allele 1 (A1) among

affected individuals,  $F_U$  – frequency of A1 among unaffected individuals,  $P$  – p-value, OR – odds ratio, CI – confidence interval, inf – infinity, d – deletion, HWE – Hardy-Weinberg equilibrium.



**Table S3. Results of Association Tests with *CARD14* Missense Variants Conditioned on PSORS1**

| Cohort                  | Variant     | Logistic Regression<br>No Covariate |                       | Logistic Regression<br>Cw6 Genotype as Covariate |        |
|-------------------------|-------------|-------------------------------------|-----------------------|--------------------------------------------------|--------|
|                         |             | OR<br>(95%CI)                       | P                     | OR<br>(95%CI)                                    | P      |
| St. Louis/Dallas        | p.Ser200Asn | 2.27 (1, 5.16)                      | 0.051                 | 1 (0, inf)                                       | 1      |
|                         | rs2066964   | 0.9 (0.76, 1.07)                    | 0.22                  | 1 (0, inf)                                       | 1      |
|                         | rs34367357  | 1.66 (1.20, 2.29)                   | 0.0022                | 1 (0, inf)                                       | 1      |
|                         | rs11652075  | 0.66 (0.56, 0.78)                   | 1.28x10 <sup>-6</sup> | 1 (0, inf)                                       | 1      |
|                         | rs13191343  | 8.90 (0.43, 183.60)                 | 0.16                  | NA                                               | NA     |
| NPF (European ancestry) | p.Ser200Asn | 0.88 (0.27, 2.79)                   | 0.82                  | 0.68 (0.17, 2.68)                                | 0.58   |
|                         | rs2066964   | 0.83 (0.63, 1.08)                   | 0.17                  | 0.86 (0.62, 1.20)                                | 0.38   |
|                         | rs34367357  | 1.21 (0.71, 2.04)                   | 0.48                  | 1.18 (0.63, 2.21)                                | 0.61   |
|                         | rs11652075  | 1.09 (0.84, 1.42)                   | 0.52                  | 1.04 (0.76, 1.42)                                | 0.81   |
|                         | rs13191343  | 2.03 (1.38, 2.99)                   | 0.00035               | NA                                               | NA     |
| Utah                    | p.Ser200Asn | 4.3 (0.57, 32.49)                   | 0.16                  | 3.98 (0.51, 30.86)                               | 0.19   |
|                         | rs2066964   | 0.87 (0.70, 1.07)                   | 0.19                  | 0.86 (0.69, 1.07)                                | 0.18   |
|                         | rs34367357  | 1.37 (0.90, 2.10)                   | 0.14                  | 1.49 (0.97, 2.30)                                | 0.071  |
|                         | rs11652075  | 0.78 (0.63, 0.96)                   | 0.017                 | 0.75 (0.60, 0.93)                                | 0.0086 |
|                         | rs13191343  | 2.03 (1.53, 2.70)                   | 1.07x10 <sup>-6</sup> | NA                                               | NA     |
| Michigan                | p.Ser200Asn | 1.18 (0.82, 1.71)                   | 0.37                  | 1.08 (0.73, 1.59)                                | 0.71   |
|                         | rs2066964   | 0.97 (0.90, 1.05)                   | 0.47                  | 0.96 (0.88, 1.04)                                | 0.28   |
|                         | rs11652075  | 0.92 (0.85, 0.99)                   | 0.023                 | 0.88 (0.81, 0.95)                                | 0.0021 |
|                         | HLA-Cw6     | 3.39 (2.99, 3.83)                   | 8.47x10 <sup>-3</sup> | NA                                               | NA     |
| Newfoundland            | p.Ser200Asn | 2.63 (0.67, 10.26)                  | 0.16                  | 2.42 (0.61, 9.58)                                | 0.21   |
|                         | rs2066964   | 1.08 (0.87, 1.34)                   | 0.50                  | 1.09 (0.87, 1.36)                                | 0.44   |
|                         | rs34367357  | 1.01 (0.69, 1.47)                   | 0.97                  | 1.02 (0.69, 1.50)                                | 0.93   |
|                         | rs11652075  | 1.07 (0.87, 1.31)                   | 0.55                  | 1.022 (0.83, 1.26)                               | 0.84   |

|         |             |                             |                        |                             |        |
|---------|-------------|-----------------------------|------------------------|-----------------------------|--------|
|         | rs13191343  | 1.76 (1.29, 2.40)           | 0.00037                | NA                          | NA     |
| Toronto | p.Ser200Asn | 1.15 (0.44, 3.00)           | 0.78                   | 1.07 (0.39, 2.92)           | 0.89   |
|         | rs2066964   | 0.92 (0.78, 1.07)           | 0.29                   | 0.91 (0.77, 1.07)           | 0.25   |
|         | rs34367357  | 0.98 (0.75, 1.29)           | 0.91                   | 1.01 (0.76, 1.34)           | 0.93   |
|         | rs11652075  | 0.78 (0.67, 0.90)           | 0.00099                | 0.78 (0.67, 0.92)           | 0.0033 |
|         | rs13191343  | 2.17 (1.76, 2.69)           | $7.30 \times 10^{-13}$ | NA                          | NA     |
| Asians  | p.Ser200Asn | $1.62 \times 10^9$ (0, inf) | 1                      | $1.41 \times 10^9$ (0, inf) | 1      |
|         | rs2066964   | 0.71 (0.52, 0.96)           | 0.025                  | 0.78 (0.51, 1.19)           | 0.25   |
|         | rs34367357  | 1.06 (0.63, 1.81)           | 0.82                   | 1.53 (0.77, 3.04)           | 0.23   |
|         | rs11652075  | 0.64 (0.48, 0.86)           | 0.0029                 | 0.57 (0.37, 0.89)           | 0.013  |
|         | rs13191343  | 4.03 (2.50, 6.52)           | $1.27 \times 10^{-8}$  | NA                          | NA     |

Logistic regression tests were performed to determine the association of p.Ser200Asn, rs2066964, rs34367357, and rs11652075 when conditioned on the PSORS1 HLA-Cw6 risk allele. In the Michigan cohort, HLA-Cw6 status was determined by genotyping several proxy markers seven coding SNPs in exon 2 and 3 of the HLA-C gene. Two of those seven distinguish HLA-Cw6 from all other HLA-C alleles when phasing is unambiguous; the other five allow discrimination of HLA-Cw6 even when haplotype phasing contains uncertainty. For all other cohorts, genotype at a single proxy SNP, rs13191343, was used. HLA-Cw6 status was coded as a dominant trait. Values are also shown in each population for the logistic regression test of Cw6 or rs13191343. In the Utah and Michigan cohorts, stratifying on the presence of the PSORS1 HLA-Cw6 risk allele increased evidence of association for rs11652075, supporting a genetic connection between rs11652075 and PSORS1.

**Table S4. Pathway Analysis of the “CARD14 Pathologic Keratinocyte” Signature**

| <b>Ingenuity Canonical Pathways</b>                                        | <b>Analysis</b>                          | <b>-log[P]</b> | <b>Ratio</b> | <b>Molecules</b>                                                                                                                                                                                                                  |
|----------------------------------------------------------------------------|------------------------------------------|----------------|--------------|-----------------------------------------------------------------------------------------------------------------------------------------------------------------------------------------------------------------------------------|
| Glucocorticoid Receptor Signaling                                          | CARD14 pathologic keratinocyte signature | 5.44E00        | 5.82E-02     | IL8, ICAM1, JAK1, SGK1, NFATC3, HSPA6, BGLAP, IL6, CCL5, ERCC2, IL1R2, AKT1, IL1RN, POLR2E, PLAU, CSF2, TNF                                                                                                                       |
| Role of Hypercytokinemia/hyperchemokinema in the Pathogenesis of Influenza | CARD14 pathologic keratinocyte signature | 5.18E00        | 1.71E-01     | CXCL10, IL8, IL36G, IL1RN, CCL5, IL6, TNF                                                                                                                                                                                         |
| Role of Hypercytokinemia/hyperchemokinema in the Pathogenesis of Influenza | Published psoriasis transcriptome        | 1.72E00        | 2.2E-01      | CXCL10, IL8, IL36G, CCL4, CCL2, IL1RN, IL36RN, IL1B, IL37                                                                                                                                                                         |
| Hepatic Fibrosis / Hepatic Stellate Cell Activation                        | CARD14 pathologic keratinocyte signature | 4.5E00         | 7.64E-02     | IL1R2, IL8, ICAM1, FN1, EDN1, CCL5, IL6, IFNAR2, TNF, MMP9, SERPINB2                                                                                                                                                              |
| Hepatic Fibrosis / Hepatic Stellate Cell Activation                        | Published psoriasis transcriptome        | 3.51E00        | 2.01E-01     | CTGF, LEP, LEPR, FGF2, PDGFA, ACTA2, MYH11, PDGFC, BCL2, IGF1, CCL2, CYP2E1, IGF1R, STAT1, MMP1 (includes EG:300339), TIMP2 (includes EG:21858), EGFR, IL8, IL4R, CXCL9, FGFR1, BAMBI, IGFBP5, MET, MYL9, TGFA, IL1B, AGTR1, MMP9 |
| Role of Cytokines in Mediating Communication between Immune Cells          | CARD14 pathologic keratinocyte signature | 4.47E00        | 1.35E-01     | IL8, IL36G, IL1RN, IL6, CSF2, IL24, TNF                                                                                                                                                                                           |
| Role of Cytokines in Mediating Communication between                       | Published psoriasis transcriptome        | 4.07E-01       | 1.15E-01     | IL8, IL36G, IL1RN, IL36RN, IL1B, IL37                                                                                                                                                                                             |

|                                                                                |                                          |          |          |                                                                                                                                                                                    |
|--------------------------------------------------------------------------------|------------------------------------------|----------|----------|------------------------------------------------------------------------------------------------------------------------------------------------------------------------------------|
| Immune Cells                                                                   |                                          |          |          |                                                                                                                                                                                    |
| IL-17A Signaling in Gastric Cells                                              | CARD14 pathologic keratinocyte signature | 4.18E00  | 2E-01    | CXCL10, IL8, CCL20, CCL5, TNF                                                                                                                                                      |
| IL-17A Signaling in Gastric Cells                                              | Published psoriasis transcriptome        | 1.39E00  | 2.4E-01  | CXCL10, IL8, MAPK14, CXCL1, CCL20, EGFR                                                                                                                                            |
| Communication between Innate and Adaptive Immune Cells                         | CARD14 pathologic keratinocyte signature | 4.01E00  | 8.08E-02 | CXCL10, IL8, IL36G, IL1RN, CCL5, IL6, CSF2, TNF                                                                                                                                    |
| Communication between Innate and Adaptive Immune Cells                         | Published psoriasis transcriptome        | 3.58E-01 | 8.08E-02 | CXCL10, IL8, IL36G, CCL4, IL1RN, IL36RN, IL1B, IL37                                                                                                                                |
| Acute Phase Response Signaling                                                 | CARD14 pathologic keratinocyte signature | 3.73E00  | 6.18E-02 | SOCS3, IL36G, SOD2, FN1, AKT1, IL1RN, OSMR, SERPINA1, IL6, TNF, HNRNPK                                                                                                             |
| Acute Phase Response Signaling                                                 | Published psoriasis transcriptome        | 5.38E-01 | 1.12E-01 | PIK3R1, SOCS2, CP, SERPINA3, IL37, STAT3, HMOX2, SHC1 (includes EG:20416), HMOX1, IL36G, MAPK14, SOD2, IL1RN, CRABP2, IL36RN, AKT3 (includes EG:10000), IL1B, SERPINA1, OSMR, RBP4 |
| IL-10 Signaling                                                                | CARD14 pathologic keratinocyte signature | 3.72E00  | 8.97E-02 | IL1R2, SOCS3, IL36G, JAK1, IL1RN, IL6, TNF                                                                                                                                         |
| IL-10 Signaling                                                                | Published psoriasis transcriptome        | 7.7E-01  | 1.28E-01 | HMOX1, IL36G, IL4R, MAPK14, IL1RN, IL36RN, IL1B, ARG2 (includes EG:11847), STAT3, IL37                                                                                             |
| Role of Macrophages, Fibroblasts and Endothelial Cells in Rheumatoid Arthritis | CARD14 pathologic keratinocyte signature | 3.69E00  | 4.69E-02 | IL8, SOCS3, ICAM1, FN1, NFATC3, DVL1, GNAQ, IL6, CCL5, IL1R2, IL36G, AKT1, IL1RN, CSF2, TNF                                                                                        |
| Role of Macrophages, Fibroblasts and Endothelial Cells in Rheumatoid Arthritis | Published psoriasis transcriptome        | 2.01E00  | 1.29E-01 | FRZB, PDGFA, FGF2, PIK3R1, PRSS2, CSNK1A1, LTB, FZD1, CCND1, PDGFC, IL36G, PRSS1/PRSS3, NFAT5, WIF1, CCL2, AKT3 (includes EG:10000), DKK2, PLCB1, TRAF5, MMP1 (includes            |

|                                                                                                       |                                          |          |          |                                                                                                                                                                                     |
|-------------------------------------------------------------------------------------------------------|------------------------------------------|----------|----------|-------------------------------------------------------------------------------------------------------------------------------------------------------------------------------------|
|                                                                                                       |                                          |          |          | EG:300339), PRKCA, IL8, SELE (includes EG:20339), PIK3C2G, NFATC1, TCF7L1, STAT3, IL37, PLCB4, MAPK14, FZD4, IL1RN, IL36RN, IL1B, FZD5, SFRP1, PDGFD, TCF7L2, WNT5A, FZD7, PRKCB    |
| Differential Regulation of Cytokine Production in Macrophages and T Helper Cells by IL-17A and IL-17F | CARD14 pathologic keratinocyte signature | 3.62E00  | 2.22E-01 | CCL5, IL6, CSF2, TNF                                                                                                                                                                |
| Differential Regulation of Cytokine Production in Macrophages and T Helper Cells by IL-17A and IL-17F | Published psoriasis transcriptome        | 9.69E-01 | 2.22E-01 | CCL4, CCL2, CXCL1, IL1B                                                                                                                                                             |
| TREM1 Signaling                                                                                       | CARD14 pathologic keratinocyte signature | 3.58E00  | 9.68E-02 | IL8, ICAM1, AKT1, IL6, CSF2, TNF                                                                                                                                                    |
| TREM1 Signaling                                                                                       | Published psoriasis transcriptome        | 7.88E-01 | 1.29E-01 | IL8, NOD2, CCL2, CASP1, ITGA5, AKT3 (includes EG:10000), IL1B, STAT3                                                                                                                |
| Airway Pathology in Chronic Obstructive Pulmonary Disease                                             | CARD14 pathologic keratinocyte signature | 3.54E00  | 3.33E-01 | IL8, TNF, MMP9                                                                                                                                                                      |
| Airway Pathology in Chronic Obstructive Pulmonary Disease                                             | Published psoriasis transcriptome        | 1.32E00  | 3.33E-01 | IL8, MMP9, MMP1 (includes EG:300339)                                                                                                                                                |
| Role of Tissue Factor in Cancer                                                                       | CARD14 pathologic keratinocyte signature | 3.24E00  | 7.21E-02 | IL8, AKT1, CDC42, GNAQ, RPS6KA1 (includes EG:20111), ITGA3, CSF2, ITGB5                                                                                                             |
| Role of Tissue Factor in Cancer                                                                       | Published psoriasis transcriptome        | 2.87E00  | 1.98E-01 | IL8, FYN, CTGF, PIK3R1, GNA11, PIK3C2G, CXCL1, HBEGF, PLAUR, F3, EIF4E, F10, LCK, MAPK14, LYN, PLCB1, AKT3 (includes EG:10000), IL1B, ITGB5, MMP1 (includes EG:300339), EGFR, PRKCA |
| Role of IL-17F in Allergic                                                                            | CARD14 pathologic                        | 3.18E00  | 1.16E-01 | CXCL10, IL8, IL6, RPS6KA1 (includes                                                                                                                                                 |

|                                                                           |                                          |          |          |                                                                                                                                                                                                                                                                                         |
|---------------------------------------------------------------------------|------------------------------------------|----------|----------|-----------------------------------------------------------------------------------------------------------------------------------------------------------------------------------------------------------------------------------------------------------------------------------------|
| Inflammatory Airway Diseases                                              | keratinocyte signature                   |          |          | EG:20111), CSF2                                                                                                                                                                                                                                                                         |
| Role of IL-17F in Allergic Inflammatory Airway Diseases                   | Published psoriasis transcriptome        | 9.36E-01 | 1.63E-01 | CXCL10, IL8, CCL4, IGF1, CCL2, CXCL1, IL1B                                                                                                                                                                                                                                              |
| Role of JAK family kinases in IL-6-type Cytokine Signaling                | CARD14 pathologic keratinocyte signature | 3.05E00  | 1.48E-01 | SOCS3, JAK1, OSMR, IL6                                                                                                                                                                                                                                                                  |
| Role of JAK family kinases in IL-6-type Cytokine Signaling                | Published psoriasis transcriptome        | 5.76E-01 | 1.48E-01 | MAPK14, OSMR, STAT3, STAT1                                                                                                                                                                                                                                                              |
| Atherosclerosis Signaling                                                 | CARD14 pathologic keratinocyte signature | 2.98E00  | 6.2E-02  | IL8, IL36G, ICAM1, IL1RN, SERPINA1, IL6, TNF, MMP9                                                                                                                                                                                                                                      |
| Atherosclerosis Signaling                                                 | Published psoriasis transcriptome        | 3.23E00  | 1.89E-01 | IL8, ALOX12B, SELE (includes EG:20339), PDGFA, CXCR4, CD36, PLA2G3, IL37, PDGFC, F3, IL36G, PLA2G2F, CCL2, IL1RN, LPL, IL36RN, IL1B, PDGFD, MMP9, MMP1 (includes EG:300339)                                                                                                             |
| IL-6 Signaling                                                            | CARD14 pathologic keratinocyte signature | 2.86E00  | 7E-02    | IL1R2, IL8, IL36G, IL1RN, IL6, TNFAIP6, TNF                                                                                                                                                                                                                                             |
| IL-6 Signaling                                                            | Published psoriasis transcriptome        | 3.84E-01 | 1.1E-01  | IL8, SHC1 (includes EG:20416), IL36G, MAPK14, IL1RN, IL36RN, CSNK2A1, IL1B, HSPB7, STAT3, IL37                                                                                                                                                                                          |
| Role of Osteoblasts, Osteoclasts and Chondrocytes in Rheumatoid Arthritis | CARD14 pathologic keratinocyte signature | 2.78E00  | 4.64E-02 | IL1R2, IL36G, AKT1, NFATC3, IL1RN, DVL1, BGLAP, IL6, ITGA3, CSF2, TNF                                                                                                                                                                                                                   |
| Role of Osteoblasts, Osteoclasts and Chondrocytes in Rheumatoid Arthritis | Published psoriasis transcriptome        | 1.97E00  | 1.39E-01 | FRZB, PIK3R1, BMP2, CSNK1A1, FZD1, BCL2, IL36G, WIF1, NFAT5, IGF1, AKT3 (includes EG:10000), DKK2, TRAF5, ADAMTS5, MMP1 (includes EG:300339), ACP5, PIK3C2G, ITGA5, NFATC1, IL37, TCF7L1, FZD4, MAPK14, FOXO1 (includes EG:2308), IL1RN, IL36RN, IL1B, BMP7, FZD5, SFRP1, TCF7L2, FZD7, |

|                                |                                          |          |          |                                                                                                                                                                      |
|--------------------------------|------------------------------------------|----------|----------|----------------------------------------------------------------------------------------------------------------------------------------------------------------------|
|                                |                                          |          |          | WNT5A                                                                                                                                                                |
| VDR/RXR Activation             | CARD14 pathologic keratinocyte signature | 2.6E00   | 7.41E-02 | CXCL10, SERPINB1, CCNC, BGLAP, CCL5, CSF2                                                                                                                            |
| VDR/RXR Activation             | Published psoriasis transcriptome        | 2.08E00  | 1.98E-01 | DEFB4A/DEFB4B, IGFBP6, SERPINB1, PPARD, PDGFA, KLK6, IGFBP5, CXCL10, FOXO1 (includes EG:2308), MXD1, HOXA10, CSNK2A1, CST6 (includes EG:1474), HSD17B2, PRKCA, PRKCB |
| Oncostatin M Signaling         | CARD14 pathologic keratinocyte signature | 2.54E00  | 1.14E-01 | EPAS1, JAK1, OSMR, PLAU                                                                                                                                              |
| Oncostatin M Signaling         | Published psoriasis transcriptome        | 1.14E00  | 2E-01    | SHC1 (includes EG:20416), TIMP3, OSMR, STAT3, PLAU, STAT1, MMP1 (includes EG:300339)                                                                                 |
| Interferon Signaling           | CARD14 pathologic keratinocyte signature | 2.54E00  | 1.11E-01 | IFIT3, JAK1, IFNAR2, BAK1                                                                                                                                            |
| Interferon Signaling           | Published psoriasis transcriptome        | 2.79E00  | 2.78E-01 | IFIT3, IFIT1, OAS1, PIAS1, MX1, IFI35, STAT2, STAT1, IRF1 (includes EG:16362), BCL2                                                                                  |
| LXR/RXR Activation             | CARD14 pathologic keratinocyte signature | 2.35E00  | 5.34E-02 | IL1R2, IL36G, IL1RN, SERPINA1, IL6, TNF, MMP9                                                                                                                        |
| LXR/RXR Activation             | Published psoriasis transcriptome        | 1.37E00  | 1.4E-01  | APOE, CD36, ABCG1, ARG2 (includes EG:11847), IL37, IL36G, LDLR, CCL2, IL1RN, LPL, IL36RN, IL1B, MMP9                                                                 |
| Huntington's Disease Signaling | CARD14 pathologic keratinocyte signature | 2.32E00  | 4.27E-02 | AKT1, POLR2E, SGK1, CASP2, CAPN1, HDAC7, HSPA6, GNAQ, STX1A, GNG12                                                                                                   |
| Huntington's Disease Signaling | Published psoriasis transcriptome        | 5.05E-01 | 1.03E-01 | YKT6, SGK1, PIK3R1, GLS, GNA11, PIK3C2G, UBE2S, NAPG, HSPA2, CDK5R1, DNMT1, HSPA4, SHC1 (includes EG:20416), PLCB4, IGF1, CASP1, IGF1R,                              |

|                                                                                                    |                                          |          |          |                                                                                                  |
|----------------------------------------------------------------------------------------------------|------------------------------------------|----------|----------|--------------------------------------------------------------------------------------------------|
|                                                                                                    |                                          |          |          | PLCB1, AKT3 (includes EG:10000), SNCA, EGFR, PRKCA, CAPN3, PRKCB                                 |
| Graft-versus-Host Disease Signaling                                                                | CARD14 pathologic keratinocyte signature | 2.13E00  | 8.33E-02 | IL36G, IL1RN, IL6, TNF                                                                           |
| Graft-versus-Host Disease Signaling                                                                | Published psoriasis transcriptome        | 6.69E-01 | 1.25E-01 | IL36G, IL1RN, IL36RN, IL1B, IL37, GZMB                                                           |
| Differential Regulation of Cytokine Production in Intestinal Epithelial Cells by IL-17A and IL-17F | CARD14 pathologic keratinocyte signature | 2.13E00  | 1.3E-01  | CCL5, CSF2, TNF                                                                                  |
| Differential Regulation of Cytokine Production in Intestinal Epithelial Cells by IL-17A and IL-17F | Published psoriasis transcriptome        | 1.77E00  | 2.73E-01 | DEFB4A/DEFB4B, CCL4, CCL2, LCN2, CXCL1, IL1B                                                     |
| IL-22 Signaling                                                                                    | CARD14 pathologic keratinocyte signature | 2.08E00  | 1.2E-01  | SOCS3, JAK1, AKT1                                                                                |
| IL-22 Signaling                                                                                    | Published psoriasis transcriptome        | 6.66E-01 | 1.6E-01  | MAPK14, AKT3 (includes EG:10000), STAT3, STAT1                                                   |
| IL-17 Signaling                                                                                    | CARD14 pathologic keratinocyte signature | 2.05E00  | 6.76E-02 | CXCL10, IL8, JAK1, AKT1, IL6                                                                     |
| IL-17 Signaling                                                                                    | Published psoriasis transcriptome        | 6.57E-01 | 1.35E-01 | DEFB4A/DEFB4B, CXCL10, IL8, IL19, MAPK14, CCL2, PIK3R1, CXCL1, PIK3C2G, AKT3 (includes EG:10000) |
| TNFR1 Signaling                                                                                    | CARD14 pathologic keratinocyte signature | 2.03E00  | 7.69E-02 | CDC42, CASP2, TNFAIP3, TNF                                                                       |
| Pathogenesis of Multiple Sclerosis                                                                 | CARD14 pathologic keratinocyte signature | 1.99E00  | 2.22E-01 | CXCL10, CCL5                                                                                     |
| Pathogenesis of Multiple Sclerosis                                                                 | Published psoriasis transcriptome        | 1.18E00  | 3.33E-01 | CXCL10, CXCL9, CCL4                                                                              |
| mTOR Signaling                                                                                     | CARD14 pathologic                        | 1.87E00  | 4.1E-02  | EIF3G, AKT1, EIF4G2, STK11, RPS15,                                                               |



|                                                             |                                          |          |          |                                                                                                                                       |
|-------------------------------------------------------------|------------------------------------------|----------|----------|---------------------------------------------------------------------------------------------------------------------------------------|
|                                                             | keratinocyte signature                   |          |          | RPTOR, HIF1A, RPS6KA1 (includes EG:20111)                                                                                             |
| Sphingolipid Metabolism                                     | CARD14 pathologic keratinocyte signature | 1.85E00  | 4.55E-02 | ARSK, SPTLC1, SPHK2, SGPP1, ARSA                                                                                                      |
| Sphingolipid Metabolism                                     | Published psoriasis transcriptome        | 7.14E-01 | 8.11E-02 | CERS6, VNN1, SPTLC2, PPAP2B, ARSF, UGCG, SMPD3, VNN3, SPTSSA                                                                          |
| Altered T Cell and B Cell Signaling in Rheumatoid Arthritis | CARD14 pathologic keratinocyte signature | 1.85E00  | 5.75E-02 | IL36G, IL1RN, IL6, CSF2, TNF                                                                                                          |
| Hereditary Breast Cancer Signaling                          | CARD14 pathologic keratinocyte signature | 1.82E00  | 4.84E-02 | AKT1, MSH2, POLR2E, WEE1, HDAC7, SLC19A1                                                                                              |
| Role of IL-17A in Arthritis                                 | CARD14 pathologic keratinocyte signature | 1.82E00  | 6.35E-02 | IL8, CCL20, CCL5, RPS6KA1 (includes EG:20111)                                                                                         |
| Role of IL-17A in Arthritis                                 | Published psoriasis transcriptome        | 6.88E-01 | 1.27E-01 | IL8, MAPK14, CCL2, PIK3R1, CXCL1, PIK3C2G, CCL20, MMP1 (includes EG:300339)                                                           |
| Cleavage and Polyadenylation of Pre-mRNA                    | CARD14 pathologic keratinocyte signature | 1.74E00  | 1.67E-01 | CPSF1, CSTF3                                                                                                                          |
| Dendritic Cell Maturation                                   | CARD14 pathologic keratinocyte signature | 1.74E00  | 3.91E-02 | IL36G, ICAM1, AKT1, IL1RN, IL6, CSF2, TNF                                                                                             |
| Dendritic Cell Maturation                                   | Published psoriasis transcriptome        | 5.1E-01  | 9.5E-02  | FCGR3B, LEP, LEPR, PIK3R1, PIK3C2G, LTB, IL37, IL36G, MAPK14, CD1A, IL1RN, IL36RN, AKT3 (includes EG:10000), IL1B, STAT2, IRF8, STAT1 |
| Systemic Lupus Erythematosus Signaling                      | CARD14 pathologic keratinocyte signature | 1.73E00  | 3.74E-02 | SNRPN, IL36G, AKT1, NFATC3, IL1RN, ZMAT5, IL6, TNF                                                                                    |
| Apoptosis Signaling                                         | CARD14 pathologic keratinocyte signature | 1.7E00   | 5.32E-02 | CASP2, CAPN1, RPS6KA1 (includes EG:20111), TNF, BAK1                                                                                  |
| Role of IL-17A in Psoriasis                                 | CARD14 pathologic keratinocyte signature | 1.67E00  | 1.54E-01 | IL8, CCL20                                                                                                                            |

|                                                         |                                          |          |          |                                                                                                                    |
|---------------------------------------------------------|------------------------------------------|----------|----------|--------------------------------------------------------------------------------------------------------------------|
| Role of IL-17A in Psoriasis                             | Published psoriasis transcriptome        | 3.75E00  | 5.38E-01 | DEFB4A/DEFB4B, S100A7, IL8, S100A9, CXCL1, CCL20, S100A8                                                           |
| IL-9 Signaling                                          | CARD14 pathologic keratinocyte signature | 1.66E00  | 7.5E-02  | SOCS3, JAK1, TNF                                                                                                   |
| IL-9 Signaling                                          | Published psoriasis transcriptome        | 1.2E00   | 1.75E-01 | IRS1, PIK3R1, SOCS2, PIK3C2G, IRS2, STAT3, STAT1                                                                   |
| ERK5 Signaling                                          | CARD14 pathologic keratinocyte signature | 1.65E00  | 6.35E-02 | AKT1, SGK1, GNAQ, RPS6KA1 (includes EG:20111)                                                                      |
| HMGB1 Signaling                                         | CARD14 pathologic keratinocyte signature | 1.61E00  | 5.05E-02 | IL8, ICAM1, AKT1, CDC42, TNF                                                                                       |
| PXR/RXR Activation                                      | CARD14 pathologic keratinocyte signature | 1.6E00   | 4.82E-02 | AKT1, CES2, IL6, TNF                                                                                               |
| PXR/RXR Activation                                      | Published psoriasis transcriptome        | 9E-01    | 1.2E-01  | GSTM1, GSTM2, PRKAR2B, FOXO1 (includes EG:2308), ALDH3A2, AKT3 (includes EG:10000), INSR, HMGCS2, CYP3A5, PPARGC1A |
| Role of MAPK Signaling in the Pathogenesis of Influenza | CARD14 pathologic keratinocyte signature | 1.6E00   | 6.06E-02 | CXCL10, AKT1, CCL5, TNF                                                                                            |
| Role of MAPK Signaling in the Pathogenesis of Influenza | Published psoriasis transcriptome        | 6E-01    | 1.21E-01 | CXCL10, MAPK14, PLA2G2F, CCL2, PLA2G3, AKT3 (includes EG:10000), PRKCA, BCL2                                       |
| IL-17A Signaling in Airway Cells                        | CARD14 pathologic keratinocyte signature | 1.6E00   | 5.56E-02 | JAK1, AKT1, CCL20, IL6                                                                                             |
| IL-17A Signaling in Airway Cells                        | Published psoriasis transcriptome        | 6.56E-01 | 1.25E-01 | DEFB4A/DEFB4B, IL19, MAPK14, PIK3R1, CXCL1, PIK3C2G, AKT3 (includes EG:10000), CCL20, STAT3                        |
| Notch Signaling                                         | CARD14 pathologic keratinocyte signature | 1.57E00  | 7.32E-02 | MAML1, FURIN, JAG2                                                                                                 |
| Hypoxia Signaling in the Cardiovascular System          | CARD14 pathologic keratinocyte signature | 1.56E00  | 6.06E-02 | AKT1, EDN1, HIF1A, UBE2J2                                                                                          |

|                                                      |                                          |          |          |                                                                                                                              |
|------------------------------------------------------|------------------------------------------|----------|----------|------------------------------------------------------------------------------------------------------------------------------|
| Hypoxia Signaling in the Cardiovascular System       | Published psoriasis transcriptome        | 3.8E-01  | 1.06E-01 | UBE2H, UBE2G1, UBE2N, UBE2S, UBE2L6, UBE2C, UBE2I                                                                            |
| Mitochondrial Dysfunction                            | CARD14 pathologic keratinocyte signature | 1.53E00  | 3.49E-02 | FURIN, SOD2, NDUFA10, APP, TXNRD2, NDUFA13                                                                                   |
| Mismatch Repair in Eukaryotes                        | CARD14 pathologic keratinocyte signature | 1.5E00   | 8.33E-02 | MSH2, SLC19A1                                                                                                                |
| Neuroprotective Role of THOP1 in Alzheimer's Disease | CARD14 pathologic keratinocyte signature | 1.48E00  | 5.56E-02 | THOP1, APP, MMP9                                                                                                             |
| Neuroprotective Role of THOP1 in Alzheimer's Disease | Published psoriasis transcriptome        | 3.47E-01 | 9.26E-02 | PRKAR2B, SERPINA3, MAPT, IDE, MMP9                                                                                           |
| HIF1 $\alpha$ Signaling                              | CARD14 pathologic keratinocyte signature | 1.48E00  | 4.72E-02 | AKT1, EDN1, HIF1A, NAA10, MMP9                                                                                               |
| HIF1 $\alpha$ Signaling                              | Published psoriasis transcriptome        | 4.44E-01 | 1.13E-01 | MMP7, MAPK14, MMP28, PIK3R1, PIK3C2G, AKT3 (includes EG:10000), MMP12, PDGFC, MMP9, SLC2A3, MMP1 (includes EG:300339), P4HTM |
| Hepatic Cholestasis                                  | CARD14 pathologic keratinocyte signature | 1.47E00  | 3.49E-02 | IL1R2, IL8, IL36G, IL1RN, IL6, TNF                                                                                           |
| Hepatic Cholestasis                                  | Published psoriasis transcriptome        | 4.03E-01 | 8.72E-02 | IL8, ADCY2, CYP7B1, IL37, IL36G, PRKAR2B, SLCO3A1, IL1RN, ABCC1, IL36RN, IL1B, INSR, GNAL, PRKCB, PRKCA                      |
| Androgen and Estrogen Metabolism                     | CARD14 pathologic keratinocyte signature | 1.42E00  | 3.23E-02 | ARSK, AKR1C1/AKR1C2, ARSA, AKR1C4                                                                                            |
| Androgen and Estrogen Metabolism                     | Published psoriasis transcriptome        | 1.13E00  | 8.13E-02 | CYP7B1, SRD5A3, DHRS9, CYP2E1, ARSF, SULT1E1, STS, HSD17B1, HSD11B1, HSD17B2                                                 |
| ILK Signaling                                        | CARD14 pathologic keratinocyte signature | 1.41E00  | 3.76E-02 | FN1, AKT1, CDC42, HIF1A, TNF, ITGB5, MMP9                                                                                    |
| ILK Signaling                                        | Published psoriasis transcriptome        | 9.11E-01 | 1.24E-01 | MUC1, BMP2, PIK3R1, ACTA2, FERMT2,                                                                                           |

|                                  |                                          |         |          |                                                                                                                                                                                                                                                                                                                                                                                                                      |
|----------------------------------|------------------------------------------|---------|----------|----------------------------------------------------------------------------------------------------------------------------------------------------------------------------------------------------------------------------------------------------------------------------------------------------------------------------------------------------------------------------------------------------------------------|
|                                  | transcriptome                            |         |          | PIK3C2G, MYH11, PDGFC, CCND1, MYL9, TGFB1I1, RHOB, KRT18, IRS1, PPAP2B, AKT3 (includes EG:10000), PPP1R12A, IRS2, ACTG2, MMP9, ITGB5, ACTA1, TESK1                                                                                                                                                                                                                                                                   |
| C21-Steroid Hormone Metabolism   | CARD14 pathologic keratinocyte signature | 1.4E00  | 3.08E-02 | AKR1C1/AKR1C2, AKR1C4                                                                                                                                                                                                                                                                                                                                                                                                |
| C21-Steroid Hormone Metabolism   | Published psoriasis transcriptome        | 2.7E-01 | 3.08E-02 | HSD11B1, HSD17B2                                                                                                                                                                                                                                                                                                                                                                                                     |
| HER-2 Signaling in Breast Cancer | CARD14 pathologic keratinocyte signature | 1.36E00 | 5.06E-02 | AKT1, CDC42, PARD6B, ITGB5                                                                                                                                                                                                                                                                                                                                                                                           |
| HER-2 Signaling in Breast Cancer | Published psoriasis transcriptome        | 1.28E00 | 1.65E-01 | CCNE2, PIK3R1, PIK3C2G, CCND1, AREG/AREGB, CCNE1, FOXO1 (includes EG:2308), AKT3 (includes EG:10000), PARD3, ITGB5, PRKCA, EGFR, PRKCB                                                                                                                                                                                                                                                                               |
| Axonal Guidance Signaling        | CARD14 pathologic keratinocyte signature | 1.36E00 | 2.79E-02 | AKT1, SDCBP, GLI3, CDC42, NFATC3, ADAM19, GNAQ, PLXNB2, ITGA3, ADAM9, GNG12, FARP2                                                                                                                                                                                                                                                                                                                                   |
| Axonal Guidance Signaling        | Published psoriasis transcriptome        | 2.12E00 | 1.23E-01 | SLIT3, RAC2, ITSN1, EPHB2, PIK3R1, GNA15, ABLIM3, PLCB1, SRGAP2, ACTR2, PTCH1, ITGA5, MYL9, FZD5, PDGFD, EPHA2, GNAL, FYN, MMP7, PDGFA, BMP2, ARHGEF7, GNA11, EPHA4, FZD1, PLXNA2, PDGFC, EIF4E, EPHB6, SHC1 (includes EG:20416), EFNB2, WASL, NFAT5, IGF1, SDC2, EFNA5, AKT3 (includes EG:10000), PRKCA, SEMA3G, CXCR4, PFN2, PIK3C2G, NFATC1, SLIT2, PLCB4, FZD4, NTRK2, PRKAR2B, ADAM10, BMP7, PRKCB, FZD7, WNT5A |

|                                                      |                                          |          |          |                                                                                                                                                                                                                                  |
|------------------------------------------------------|------------------------------------------|----------|----------|----------------------------------------------------------------------------------------------------------------------------------------------------------------------------------------------------------------------------------|
| CNTF Signaling                                       | CARD14 pathologic keratinocyte signature | 1.26E00  | 5.77E-02 | JAK1, AKT1, RPS6KA1 (includes EG:20111)                                                                                                                                                                                          |
| Colorectal Cancer Metastasis Signaling               | CARD14 pathologic keratinocyte signature | 1.25E00  | 3.16E-02 | JAK1, AKT1, MSH2, DVL1, IL6, TNF, MMP9, GNG12                                                                                                                                                                                    |
| Colorectal Cancer Metastasis Signaling               | Published psoriasis transcriptome        | 5.82E-01 | 1.07E-01 | MMP7, PTGER3, PIK3R1, FZD1, CCND1, PDGFC, BIRC5, RHOB, AKT3 (includes EG:10000), STAT1, MMP12, MMP1 (includes EG:300339), EGFR, ADCY2, MMP28, PIK3C2G, STAT3, TCF7L1, CDH1, PRKAR2B, FZD4, FZD5, MMP9, GNAL, TCF7L2, FZD7, WNT5A |
| Amyloid Processing                                   | CARD14 pathologic keratinocyte signature | 1.24E00  | 5.56E-02 | AKT1, CAPN1, APP                                                                                                                                                                                                                 |
| Amyloid Processing                                   | Published psoriasis transcriptome        | 8.25E-01 | 1.48E-01 | MAPK14, PRKAR2B, CSNK2A1, CSNK1A1, AKT3 (includes EG:10000), MAPT, CDK5R1, CAPN3                                                                                                                                                 |
| FXR/RXR Activation                                   | CARD14 pathologic keratinocyte signature | 1.21E00  | 4.04E-02 | IL36G, AKT1, IL1RN, TNF                                                                                                                                                                                                          |
| FXR/RXR Activation                                   | Published psoriasis transcriptome        | 3.57E-01 | 9.09E-02 | APOE, IL36G, FOXO1 (includes EG:2308), IL1RN, IL36RN, AKT3 (includes EG:10000), IL1B, IL37, PPARGC1A                                                                                                                             |
| FAK Signaling                                        | CARD14 pathologic keratinocyte signature | 1.18E00  | 3.96E-02 | AKT1, CSK, CAPN1, ITGA3                                                                                                                                                                                                          |
| FAK Signaling                                        | Published psoriasis transcriptome        | 9.29E-01 | 1.29E-01 | FYN, ARHGEF7, HMMR, PIK3R1, ACTA2, PIK3C2G, ITGA5, AKT3 (includes EG:10000), ACTG2, TNS1, ACTA1, EGFR, CAPN3                                                                                                                     |
| Tumoricidal Function of Hepatic Natural Killer Cells | CARD14 pathologic keratinocyte signature | 1.18E00  | 8.33E-02 | ICAM1, SRGN                                                                                                                                                                                                                      |
| Tumoricidal Function of                              | Published psoriasis                      | 5.76E-01 | 1.67E-01 | SERPINB9, SRGN, LYVE1, GZMB                                                                                                                                                                                                      |

|                                                     |                                          |          |          |                                                                                                                                                                                       |
|-----------------------------------------------------|------------------------------------------|----------|----------|---------------------------------------------------------------------------------------------------------------------------------------------------------------------------------------|
| Hepatic Natural Killer Cells                        | transcriptome                            |          |          |                                                                                                                                                                                       |
| Role of JAK1, JAK2 and TYK2 in Interferon Signaling | CARD14 pathologic keratinocyte signature | 1.18E00  | 7.41E-02 | JAK1, IFNAR2                                                                                                                                                                          |
| Role of JAK1, JAK2 and TYK2 in Interferon Signaling | Published psoriasis transcriptome        | 3.02E-01 | 1.11E-01 | STAT2, STAT3, STAT1                                                                                                                                                                   |
| Insulin Receptor Signaling                          | CARD14 pathologic keratinocyte signature | 1.17E00  | 3.76E-02 | SOCS3, JAK1, AKT1, SGK1, RPTOR                                                                                                                                                        |
| Insulin Receptor Signaling                          | Published psoriasis transcriptome        | 5.41E-01 | 1.13E-01 | FYN, SGK1, PPP1R3C, PIK3R1, PIK3C2G, EIF4E, EIF4EBP1, SHC1 (includes EG:20416), PRKAR2B, FOXO1 (includes EG:2308), IRS1, PPP1R12A, AKT3 (includes EG:10000), IRS2, INSR               |
| Airway Inflammation in Asthma                       | CARD14 pathologic keratinocyte signature | 1.16E00  | 1.67E-01 | TNF                                                                                                                                                                                   |
| NF-κB Signaling                                     | CARD14 pathologic keratinocyte signature | 1.16E00  | 3.51E-02 | IL1R2, IL36G, AKT1, IL1RN, TNFAIP3, TNF                                                                                                                                               |
| NF-κB Signaling                                     | Published psoriasis transcriptome        | 1.5E00   | 1.4E-01  | BMP2, UBE2N, TGFBR3, FGFR1, PIK3R1, PIK3C2G, IL37, MALT1, TANK, LCK, IL36G, GHR, NTRK2, IL1RN, IL36RN, TGFA, CSNK2A1, IGF1R, AKT3 (includes EG:10000), IL1B, TRAF5, INSR, EGFR, PRKCB |
| N-Glycan Degradation                                | CARD14 pathologic keratinocyte signature | 1.15E00  | 8E-02    | MANEA, MAN2B1                                                                                                                                                                         |
| N-Glycan Degradation                                | Published psoriasis transcriptome        | 1.47E00  | 2.4E-01  | MAN1C1, GM2A, MAN1A1, MAN1A2, MAN2A2, ENGASE                                                                                                                                          |
| G Beta Gamma Signaling                              | CARD14 pathologic keratinocyte signature | 1.14E00  | 3.54E-02 | AKT1, CDC42, GNAQ, GNG12                                                                                                                                                              |
| G Beta Gamma Signaling                              | Published psoriasis transcriptome        | 4.67E-01 | 9.73E-02 | SHC1 (includes EG:20416), ADCY2, PRKAR2B, GNA15, GNA11, AKT3                                                                                                                          |

|                               |                                          |          |          |                                                                                                                                                                                                                                  |
|-------------------------------|------------------------------------------|----------|----------|----------------------------------------------------------------------------------------------------------------------------------------------------------------------------------------------------------------------------------|
|                               |                                          |          |          | (includes EG:10000), HBEGF, GNAL, PRKCA, EGFR, PRKCB                                                                                                                                                                             |
| Methionine Metabolism         | CARD14 pathologic keratinocyte signature | 1.12E00  | 2.67E-02 | MAT2B, AMD1                                                                                                                                                                                                                      |
| PPAR Signaling                | CARD14 pathologic keratinocyte signature | 1.11E00  | 3.92E-02 | IL1R2, IL36G, IL1RN, TNF                                                                                                                                                                                                         |
| PPAR Signaling                | Published psoriasis transcriptome        | 6.17E-01 | 1.18E-01 | SHC1 (includes EG:20416), IL36G, PPARD, PDGFA, IL1RN, IL36RN, IL1B, INSR, IL37, PDGFD, PDGFC, PPARGC1A                                                                                                                           |
| Glioma Invasiveness Signaling | CARD14 pathologic keratinocyte signature | 1.1E00   | 5E-02    | PLAU, ITGB5, MMP9                                                                                                                                                                                                                |
| Glioma Invasiveness Signaling | Published psoriasis transcriptome        | 1.97E00  | 2E-01    | TIMP3, TIMP4, F2R, RHOB, HMMR, PIK3R1, PIK3C2G, PLAUR, PLAU, ITGB5, MMP9, TIMP2 (includes EG:21858)                                                                                                                              |
| IL-15 Production              | CARD14 pathologic keratinocyte signature | 1.09E00  | 6.45E-02 | JAK1, IL6                                                                                                                                                                                                                        |
| IL-15 Production              | Published psoriasis transcriptome        | 4.65E-01 | 1.29E-01 | TWF1 (includes EG:19230), MST1R, STAT1, IRF1 (includes EG:16362)                                                                                                                                                                 |
| Ephrin Receptor Signaling     | CARD14 pathologic keratinocyte signature | 1.08E00  | 3.03E-02 | AKT1, SDCBP, CDC42, GNAQ, ITGA3, GNG12                                                                                                                                                                                           |
| Ephrin Receptor Signaling     | Published psoriasis transcriptome        | 1.9E00   | 1.36E-01 | RAC2, FYN, ITSN1, EPHB2, PDGFA, GNA11, EPHA4, PDGFC, EPHB6, EFNB2, SHC1 (includes EG:20416), WASL, GNA15, SDC2, SORBS1, EFNA5, AKT3 (includes EG:10000), ACTR2, ANGPT1, CXCR4, PIK3C2G, ITGA5, STAT3, ADAM10, PDGFD, EPHA2, GNAL |
| TNFR2 Signaling               | CARD14 pathologic keratinocyte signature | 1.06E00  | 6.06E-02 | TNFAIP3, TNF                                                                                                                                                                                                                     |
| Pyruvate Metabolism           | CARD14 pathologic                        | 1.05E00  | 2.33E-02 | ME2, ACOT9, HAGH                                                                                                                                                                                                                 |

|                                                        |                                          |          |          |                                                                                                         |
|--------------------------------------------------------|------------------------------------------|----------|----------|---------------------------------------------------------------------------------------------------------|
|                                                        | keratinocyte signature                   |          |          |                                                                                                         |
| Pyruvate Metabolism                                    | Published psoriasis transcriptome        | 4.66E-01 | 5.38E-02 | ACSL3, ACACB, ALDH1A3, ALDH3A2, DLAT, PCK1 (includes EG:18534), ME1                                     |
| IL-15 Signaling                                        | CARD14 pathologic keratinocyte signature | 1.03E00  | 4.48E-02 | JAK1, AKT1, CSF2                                                                                        |
| IL-15 Signaling                                        | Published psoriasis transcriptome        | 9.72E-01 | 1.49E-01 | SHC1 (includes EG:20416), LCK, MAPK14, SYK, PIK3R1, PIK3C2G, AKT3 (includes EG:10000), STAT3, AXL, BCL2 |
| Role of JAK1 and JAK3 in $\gamma$ c Cytokine Signaling | CARD14 pathologic keratinocyte signature | 1.03E00  | 4.55E-02 | IL7R, SOCS3, JAK1                                                                                       |
| Role of JAK1 and JAK3 in $\gamma$ c Cytokine Signaling | Published psoriasis transcriptome        | 1.01E00  | 1.52E-01 | BLNK, SHC1 (includes EG:20416), IL4R, IRS1, SYK, PIK3R1, PIK3C2G, IRS2, STAT3, STAT1                    |
| JAK/Stat Signaling                                     | CARD14 pathologic keratinocyte signature | 1.03E00  | 4.69E-02 | SOCS3, JAK1, AKT1                                                                                       |
| JAK/Stat Signaling                                     | Published psoriasis transcriptome        | 7.14E-01 | 1.41E-01 | SHC1 (includes EG:20416), PIK3R1, PIAS1, SOCS2, PIK3C2G, AKT3 (includes EG:10000), STAT2, STAT3, STAT1  |
| Nicotinate and Nicotinamide Metabolism                 | CARD14 pathologic keratinocyte signature | 1.02E00  | 2.99E-02 | NAPRT1, SGK1, NAMPT, PKN1                                                                               |
| Nicotinate and Nicotinamide Metabolism                 | Published psoriasis transcriptome        | 3.4E-01  | 7.52E-02 | MAP3K9, NEK2, VNN1, SGK1, PNP, CSNK1A1, NAMPT, TTK, VNN3, CDK1                                          |
| Paxillin Signaling                                     | CARD14 pathologic keratinocyte signature | 1.01E00  | 3.64E-02 | CDC42, CSK, ITGA3, ITGB5                                                                                |
| G Protein Signaling Mediated by Tubby                  | CARD14 pathologic keratinocyte signature | 9.86E-01 | 5.13E-02 | GNAQ, GNG12                                                                                             |
| G Protein Signaling Mediated by Tubby                  | Published psoriasis transcriptome        | 4.04E-01 | 1.03E-01 | LCK, PLCB4, PLCB1, INSR                                                                                 |
| Cholecystokinin/Gastrin-mediated Signaling             | CARD14 pathologic keratinocyte signature | 9.85E-01 | 3.77E-02 | IL36G, IL1RN, GNAQ, TNF                                                                                 |



|                                                 |                                          |          |          |                                                                                                                                        |
|-------------------------------------------------|------------------------------------------|----------|----------|----------------------------------------------------------------------------------------------------------------------------------------|
| Cholecystokinin/Gastrin-mediated Signaling      | Published psoriasis transcriptome        | 1.63E00  | 1.6E-01  | ITPR2, EPHA4, IL37, SHC1 (includes EG:20416), PLCB4, IL36G, MAPK14, RHOB, IL1RN, ITPR3, IL36RN, IL1B, PLCB1, MEF2C, PRKCB, EGFR, PRKCA |
| Regulation of eIF4 and p70S6K Signaling         | CARD14 pathologic keratinocyte signature | 9.71E-01 | 2.98E-02 | EIF3G, AKT1, EIF4G2, RPS15, ITGA3                                                                                                      |
| Inhibition of Angiogenesis by TSP1              | CARD14 pathologic keratinocyte signature | 9.4E-01  | 5.26E-02 | AKT1, MMP9                                                                                                                             |
| Inhibition of Angiogenesis by TSP1              | Published psoriasis transcriptome        | 1.26E00  | 1.84E-01 | FYN, CD47, MAPK14, SDC2, CD36, AKT3 (includes EG:10000), MMP9                                                                          |
| Role of JAK2 in Hormone-like Cytokine Signaling | CARD14 pathologic keratinocyte signature | 9.4E-01  | 5.71E-02 | SOCS3, JAK1                                                                                                                            |
| Role of JAK2 in Hormone-like Cytokine Signaling | Published psoriasis transcriptome        | 1.33E00  | 2E-01    | SHC1 (includes EG:20416), GHR, IRS1, SOCS2, IRS2, STAT3, STAT1                                                                         |
| Agrin Interactions at Neuromuscular Junction    | CARD14 pathologic keratinocyte signature | 9.4E-01  | 4.41E-02 | CDC42, DVL1, ITGA3                                                                                                                     |
| Agrin Interactions at Neuromuscular Junction    | Published psoriasis transcriptome        | 3.94E-01 | 1.18E-01 | RAC2, ARHGEF7, ACTA2, LAMA2, ITGA5, ACTG2, ACTA1, EGFR                                                                                 |
| IL-4 Signaling                                  | CARD14 pathologic keratinocyte signature | 9.4E-01  | 4.17E-02 | JAK1, AKT1, NFATC3                                                                                                                     |
| IL-4 Signaling                                  | Published psoriasis transcriptome        | 8.66E-01 | 1.39E-01 | SHC1 (includes EG:20416), IL4R, NFAT5, IL13RA1, IRS1, PIK3R1, PIK3C2G, AKT3 (includes EG:10000), NFATC1, NR3C2 (includes EG:110784)    |
| Pancreatic Adenocarcinoma Signaling             | CARD14 pathologic keratinocyte signature | 9.39E-01 | 3.39E-02 | JAK1, AKT1, CDC42, MMP9                                                                                                                |
| Pancreatic Adenocarcinoma Signaling             | Published psoriasis transcriptome        | 1.14E00  | 1.36E-01 | PIK3R1, PIK3C2G, HBEGF, STAT3, PDGFC, CCND1, BIRC5, BCL2, HMOX1, CCNE1, CYP2E1, TGFA, AKT3 (includes EG:10000), STAT1, MMP9, EGFR      |

|                                                                              |                                          |          |          |                                                                                                                                                           |
|------------------------------------------------------------------------------|------------------------------------------|----------|----------|-----------------------------------------------------------------------------------------------------------------------------------------------------------|
| p38 MAPK Signaling                                                           | CARD14 pathologic keratinocyte signature | 9.28E-01 | 3.77E-02 | IL1R2, IL36G, IL1RN, TNF                                                                                                                                  |
| p38 MAPK Signaling                                                           | Published psoriasis transcriptome        | 7.13E-01 | 1.23E-01 | MAPKAPK3, PLA2G3, H3F3A/H3F3B, IL37, IL36G, MAPK14, PLA2G2F, IL1RN, IL36RN, IL1B, HSPB7, MEF2C, STAT1                                                     |
| Neurotrophin/TRK Signaling                                                   | CARD14 pathologic keratinocyte signature | 9.26E-01 | 3.95E-02 | AKT1, CDC42, RPS6KA1 (includes EG:20111)                                                                                                                  |
| Renal Cell Carcinoma Signaling                                               | CARD14 pathologic keratinocyte signature | 9.12E-01 | 4.11E-02 | AKT1, CDC42, HIF1A                                                                                                                                        |
| Coagulation System                                                           | CARD14 pathologic keratinocyte signature | 8.98E-01 | 5.26E-02 | SERPINA1, PLAU                                                                                                                                            |
| Coagulation System                                                           | Published psoriasis transcriptome        | 1.95E00  | 2.37E-01 | F10, F12, F2R, PLAUR, SERPINA1, PLAU, TFPI, F3, PLAT                                                                                                      |
| Nucleotide Excision Repair Pathway                                           | CARD14 pathologic keratinocyte signature | 8.98E-01 | 5.71E-02 | POLR2E, ERCC2                                                                                                                                             |
| Selenoamino Acid Metabolism                                                  | CARD14 pathologic keratinocyte signature | 8.98E-01 | 2.74E-02 | GGT2, MAT2B                                                                                                                                               |
| Tight Junction Signaling                                                     | CARD14 pathologic keratinocyte signature | 8.8E-01  | 3.12E-02 | AKT1, CDC42, CPSF1, TNF, CSTF3                                                                                                                            |
| Tight Junction Signaling                                                     | Published psoriasis transcriptome        | 4.95E-01 | 1.06E-01 | CLDN10, OCLN, TJP1 (includes EG:21872), ACTA2, MYH11, CASK, MYL9, MYLK, MPDZ, PRKAR2B, CLDN8, JAM3, AKT3 (includes EG:10000), ACTG2, SPTAN1, MAGI2, ACTA1 |
| Androgen Signaling                                                           | CARD14 pathologic keratinocyte signature | 8.75E-01 | 2.88E-02 | POLR2E, GNAQ, ERCC2, GNG12                                                                                                                                |
| Role of Pattern Recognition Receptors in Recognition of Bacteria and Viruses | CARD14 pathologic keratinocyte signature | 8.59E-01 | 3.66E-02 | CCL5, IL6, TNF                                                                                                                                            |
| Role of Pattern Recognition                                                  | Published psoriasis                      | 1.45E00  | 1.59E-01 | OAS1, OAS2, PIK3R1, PIK3C2G, OAS3,                                                                                                                        |

|                                                  |                                          |          |          |                                                                                                                  |
|--------------------------------------------------|------------------------------------------|----------|----------|------------------------------------------------------------------------------------------------------------------|
| Receptors in Recognition of Bacteria and Viruses | transcriptome                            |          |          | IFIH1, CLEC7A, IRF7, NOD2, SYK, DDX58, CASP1, IL1B                                                               |
| NF-κB Activation by Viruses                      | CARD14 pathologic keratinocyte signature | 8.59E-01 | 3.66E-02 | AKT1, ITGA3, ITGB5                                                                                               |
| NF-κB Activation by Viruses                      | Published psoriasis transcriptome        | 2.68E-01 | 9.76E-02 | LCK, PIK3R1, PIK3C2G, ITGA5, AKT3 (includes EG:10000), ITGB5, PRKCA, PRKCB                                       |
| CD28 Signaling in T Helper Cells                 | CARD14 pathologic keratinocyte signature | 8.55E-01 | 3.1E-02  | AKT1, CDC42, NFATC3, CSK                                                                                         |
| CD28 Signaling in T Helper Cells                 | Published psoriasis transcriptome        | 6.49E-01 | 1.09E-01 | FYN, ACTR2, ITPR2, PIK3R1, PIK3C2G, NFATC1, MALT1, PTPRC, LCK, NFAT5, SYK, ITPR3, AKT3 (includes EG:10000), LCP2 |

A list of the top 200 upregulated and top 200 downregulated genes that differentiate the global transcriptome of overtly pathogenic and non-pathogenic CARD14 variants was generated as described in Methods. Pathway analysis was performed with Ingenuity Pathway Analysis (IPA), and a comparison was made with the results of a published psoriasis transcriptome.<sup>3</sup> The top 100 pathways (by  $-\log[P]$ ) from the CARD14 pathway analysis were selected and compared to the published transcriptome.<sup>3</sup> This table presents the results of that comparison. Each pathway in this table has results reported from the CARD14 pathologic keratinocyte signature. Most, but not all, of the pathways have a second listing with results from the psoriasis transcriptome. Pathways with a listing only for the CARD14 transfectants were not identified by IPA in the general psoriasis transcriptome. In the table, “Analysis” refers to the expression data used for the pathway analysis, e.g. CARD14 pathologic keratinocyte signature or published psoriasis transcriptome.<sup>3</sup>  $-\log[P]$  – the negative logarithm of the p-value, Ratio – the ratio of the number of molecules in the indicated expression signature to the total number of genes in that pathway according to IPA.

## References

1. Kumar P, Henikoff S, Ng PC. Predicting the effects of coding non-synonymous variants on protein function using the SIFT algorithm. *Nat Protoc* 2009;4:1073-81.
2. Purcell S, Neale B, Todd-Brown K, et al. PLINK: a tool set for whole-genome association and population-based linkage analyses. *Am J Hum Genet* 2007;81:559-75.
3. Suarez-Farinas M, Lowes MA, Zaba LC, Krueger JG. Evaluation of the psoriasis transcriptome across different studies by gene set enrichment analysis (GSEA). *PLoS One* 2010;5:e10247.
